# Supplementary material
Source: PubMed Central journal article supplement (PMC4774972)
Supplement: jm5b01593_si_001.pdf [file jm5b01593_si_001.pdf]

## **Supporting Information**

### **Activity and Predicted Nephrotoxicity of Synthetic Antibiotics Based on Polymyxin B**

*Alejandra Gallardo-Godoy<sup>1</sup>, Craig Muldoon<sup>1</sup>, Bernd Becker<sup>1</sup>, Alysha G. Elliott<sup>1</sup>, Lawrence H. Lash<sup>2</sup>, Johnny X. Huang<sup>1</sup>, Mark S. Butler<sup>1</sup>, Ruby Pelingon<sup>1</sup>, Angela M. Kavanagh<sup>1</sup>, Soumya Ramu<sup>1</sup>, Wanida Phetsang<sup>1</sup>, Mark A.T. Blaskovich<sup>1\*</sup> and Matthew A. Cooper<sup>1\*</sup>.*

*1) Institute for Molecular Bioscience, The University of Queensland, Brisbane, Queensland 4072 Australia. E-mail: m.cooper@uq.edu.au, m.blaskovich@uq.edu.au, Fax +61-7-3346-2090, Phone +61-7-3346-2044*

*2) Department of Pharmacology, Wayne State University, School of Medicine, 540 East Canfield Avenue, Detroit, MI 48201, USA*

*\* co-corresponding authors*

## Table of Contents

|                                                                                                 |    |
|-------------------------------------------------------------------------------------------------|----|
| Table S1. Compound Structures and Summary of Characterization.....                              | 4  |
| Table S2. Bacterial strains used for Minimum Inhibitory Concentration (MIC) determinations..... | 8  |
| Figure S1. Structures of Vancomycin and Gentamicin .....                                        | 9  |
| Scheme S1. Synthesis example for compounds 18 and 19.....                                       | 10 |
| Materials and Methods: Synthesis .....                                                          | 11 |
| Fmoc-L-Thr-OAllyl .....                                                                         | 12 |
| DHP-Resin Fmoc-L-Thr-OAllyl.....                                                                | 12 |
| DHP-Resin NH-L-Thr-OAllyl .....                                                                 | 13 |
| General method for Peptide Coupling.....                                                        | 13 |
| General method for O-Allyl/N-Alloc deprotection.....                                            | 13 |
| General method for DHP-resin cyclization.....                                                   | 13 |
| General method for Fatty Acid Coupling.....                                                     | 14 |
| DHP resin cleavage .....                                                                        | 14 |
| General method for ivDde removal.....                                                           | 14 |
| General method for L-Arg and L-Glu coupling .....                                               | 14 |
| Compound <b>10</b> .....                                                                        | 14 |
| Compound <b>14</b> :.....                                                                       | 15 |
| Compound <b>15</b> .....                                                                        | 16 |
| Compound <b>38</b> .....                                                                        | 16 |
| Table S3. Summary of amino acids and the calculated amounts.....                                | 18 |
| Figure S2a. (+)-ESI-TOF-MS/MS fragmentation assignments of compound <b>10</b> .....             | 19 |
| Figure S2b. HR-(+)-ESI-TOF-MS of the $[M+2H]^{2+}$ mass ion peak of compound <b>10</b> . .....  | 20 |
| Figure S2c. LC-MS analysis of compound <b>10</b> .....                                          | 21 |
| Figure S2d. $^1\text{H}$ NMR in $\text{D}_2\text{O}$ of compound <b>10</b> . .....              | 22 |
| Figure S2e. gCOSY spectra in $\text{D}_2\text{O}$ of compound <b>10</b> . .....                 | 23 |
| Figure S2f. edHSQC spectra in $\text{D}_2\text{O}$ of compound <b>10</b> . .....                | 23 |
| Figure S3a. (+)-ESI-TOF-MS/MS fragmentation assignments of compound <b>14</b> .....             | 24 |
| Figure S3b. HR-(+)-ESI-TOF-MS of the $[M+2H]^{2+}$ mass ion peak of compound <b>14</b> . .....  | 25 |
| Figure S3c. LC-MS analysis of compound <b>14</b> .....                                          | 26 |
| Figure S3d. $^1\text{H}$ NMR in $\text{D}_2\text{O}$ of compound <b>14</b> . .....              | 27 |
| Figure S3e. gCOSY spectra in $\text{D}_2\text{O}$ of compound <b>14</b> .....                   | 28 |

|                                                                                                         |    |
|---------------------------------------------------------------------------------------------------------|----|
| Figure S3f. edHSQC spectra in D2O of compound <b>14</b> .....                                           | 28 |
| Figure S4a. (+)-ESI-TOF-MS/MS fragmentation assignments of compound <b>15</b> .....                     | 29 |
| Figure S4b. HR-(+)-ESI-TOF-MS of the $[M+2H]^{2+}$ mass ion peak of compound <b>15</b> . ....           | 30 |
| Figure S4c. LC-MS analysis of compound <b>15</b> .....                                                  | 31 |
| Figure S4d. $^1H$ NMR in D2O of compound <b>15</b> .....                                                | 32 |
| Figure S4e. gCOSY spectra in D <sub>2</sub> O of compound <b>15</b> .....                               | 33 |
| Figure S4f. edHSQC spectra in D <sub>2</sub> O of compound <b>15</b> . ....                             | 33 |
| Figure S5a. (+)-ESI-TOF-MS/MS fragmentation assignments of compound <b>38</b> .....                     | 34 |
| Figure S5b. HR-(+)-ESI-TOF-MS of the $[M+2H]^{2+}$ mass ion peak of compound <b>38</b> . ....           | 35 |
| Figure S5c. LC-MS analysis of compound <b>38</b> .....                                                  | 36 |
| Figure S5d. $^1H$ NMR in D <sub>2</sub> O of compound <b>38</b> . ....                                  | 37 |
| Figure S5e. gCOSY in D <sub>2</sub> O of compound <b>38</b> . ....                                      | 38 |
| Figure S5f. edHSQC in D <sub>2</sub> O of compound <b>38</b> .....                                      | 38 |
| Figure S6. $^1H$ NMR in CDCl <sub>3</sub> of intermediate Fmoc-L-Thr-OAllyl ( <b>4</b> ; Scheme 1)..... | 39 |
| REFERENCES .....                                                                                        | 40 |

**Table S1. Compound Structures and Summary of Characterization.**

| Structure                                                                           | Cmpd | Molecular Formula | Exact Mass Parent | Calculated M+2 | Measured M+2 | Err (ppm) | % Purity by ELSD | % Purity by UV 210nm |
|-------------------------------------------------------------------------------------|------|-------------------|-------------------|----------------|--------------|-----------|------------------|----------------------|
| 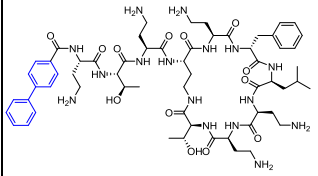   | 10   | C60H90N16O13      | 1242.6873         | 622.3509       | 622.3512     | -0.40     | >95              | >95                  |
|    | 11   | C55H96N16O13      | 1188.7343         | 595.3744       | 595.3757     | -2.10     | >95              | >95                  |
|    | 12   | C51H88N14O12      | 1088.6700         | 545.3350       | 545.3430     | -0.71     | >95              | >95                  |
|   | 13   | C54H86N17O13Cl    | 1216.8200         | 608.8213       | 608.8227     | -2.32     | >95              | >95                  |
|  | 14   | C60H90N16O14      | 1258.6822         | 630.3484       | 630.3487     | -0.44     | >95              | >95                  |
|  | 15   | C60H91N17O13      | 1257.6982         | 629.8564       | 629.8594     | -4.86     | >95              | >95                  |
|  | 16   | C54H86N17O13Cl    | 1215.6280         | 608.8213       | 608.8230     | -2.90     | >95              | >95                  |
|  | 17   | C53H83N16O14Cl    | 1202.5963         | 602.3054       | 602.3063     | -1.47     | >95              | >95                  |

| Structure | Cmpd | Molecular Formula | Exact Mass Parent | Calculated M+2 | Measured M+2 | Err (ppm) | % Purity by ELSD | % Purity by UV 210nm |
|-----------|------|-------------------|-------------------|----------------|--------------|-----------|------------------|----------------------|
|           | 18   | C61H108N20O14     | 1344.8354         | 673.4250       | 673.4280     | -4.42     | >95              | >95                  |
|           | 19   | C60H103N17O16     | 1317.7769         | 659.8957       | 659.8959     | -0.22     | >95              | >95                  |
|           | 20   | C60H98N16O13      | 1250.7499         | 626.3822       | 626.3850     | -4.35     | >95              | >95                  |
|           | 21   | C57H100N18O13     | 1244.7717         | 623.3931       | 623.3957     | -4.09     | >95              | >95                  |
|           | 22   | C61H108N20O14     | 1344.8354         | 673.4250       | 673.4256     | -0.91     | >95              | >95                  |
|           | 23   | C60H103N17O16     | 1317.7769         | 659.8957       | 659.8983     | -3.94     | >95              | >95                  |
|           | 24   | C55H95N15O14      | 1189.7183         | 595.8664       | 595.8685     | -3.56     | >95              | >95                  |
|           | 25   | C60H98N16O13      | 1250.7499         | 626.3822       | 626.3847     | -3.86     | >95              | >95                  |

| Structure                                                                           | Cmpd | Molecular Formula | Exact Mass Parent | Calculated M+2 | Measured M+2 | Err (ppm) | % Purity by ELS | % Purity by UV 210nm |
|-------------------------------------------------------------------------------------|------|-------------------|-------------------|----------------|--------------|-----------|-----------------|----------------------|
| 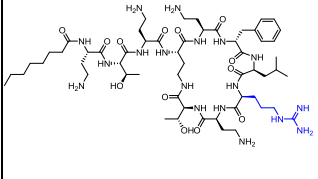   | 26   | C57H100N18O13     | 1244.7717         | 623.3931       | 623.3955     | -3.81     | >95             | >95                  |
|    | 27   | C64H98N16O13      | 1298.7499         | 650.3822       | 650.3848     | -3.90     | >95             | >95                  |
|    | 28   | C59H104N16O13     | 1244.7969         | 623.4057       | 623.4084     | -4.26     | >95             | >95                  |
|   | 29   | C61H100N16O13     | 1264.7656         | 633.3901       | 633.3907     | -0.93     | >95             | >95                  |
|  | 30   | C56H106N16O13     | 1210.8125         | 606.4135       | 606.4152     | -2.72     | >95             | >95                  |
|  | 31   | C61H108N20O14     | 1344.8354         | 673.4250       | 673.4247     | 0.47      | >95             | >95                  |
|  | 32   | C60H103N17O16     | 1317.7769         | 659.8957       | 659.8984     | -4.09     | >95             | >95                  |
|  | 33   | C55H95N15O14      | 1189.7183         | 595.8664       | 595.8689     | -4.09     | >95             | >95                  |

| Structure | Cmpd | Molecular Formula | Exact Mass Parent | Calculated M+2 | Measured M+2 | Err (ppm) | % Purity by ELSD | % Purity by UV 210nm |
|-----------|------|-------------------|-------------------|----------------|--------------|-----------|------------------|----------------------|
|           | 34   | C60H98N16O13      | 1250.7499         | 626.3822       | 626.3849     | -4.30     | >95              | >95                  |
|           | 35   | C57H100N18O13     | 1244.7717         | 623.3931       | 623.3958     | -4.25     | >95              | >95                  |
|           | 36   | C55H96N16O13      | 1188.7343         | 595.3744       | 595.3731     | 2.26      | >95              | >95                  |
|           | 37   | C54H93N15O14      | 1175.7026         | 588.8586       | 588.858      | 1.05      | >95              | >95                  |
|           | 38   | C53H91N15O13      | 1145.6921         | 573.8533       | 573.8547     | -2.43     | >95              | >95                  |
|           | 39   | C49H83N13O12      | 1045.6300         | 523.8150       | 523.8231     | -3.06     | >95              | >95                  |
|           | 40   | C53H91N15O13      | 1145.6921         | 573.8533       | 573.8541     | -1.39     | >95              | >95                  |
|           | 41   | C53H91N15O13      | 1145.6921         | 573.8533       | 573.8517     | 2.88      | >95              | >95                  |

**Table S2. Bacterial strains used for Minimum Inhibitory Concentration (MIC) determinations.**

| Organism                       | Strain              | Strain description                                  | Strain Source                                                                                                   |
|--------------------------------|---------------------|-----------------------------------------------------|-----------------------------------------------------------------------------------------------------------------|
| <i>Escherichia coli</i>        | ATCC 25922          | FDA strain Seattle 1946                             | ATCC                                                                                                            |
| <i>Klebsiella pneumoniae</i>   | ATCC 13883          | Control strain                                      | ATCC                                                                                                            |
| <i>Klebsiella pneumoniae</i>   | ATCC 700603         | Multi-drug resistant                                | ATCC                                                                                                            |
| <i>Klebsiella pneumoniae</i>   | BAA-2146            | NDM-1 (New Delhi Metallo-beta-lactamase-1) positive | ATCC                                                                                                            |
| <i>Acinetobacter baumannii</i> | ATCC 19606          | Type strain                                         | ATCC                                                                                                            |
| <i>Pseudomonas aeruginosa</i>  | ATCC 27853          | Type strain                                         | ATCC                                                                                                            |
| <i>Pseudomonas aeruginosa</i>  | FADDI-PA070         | Clinical isolate, polymyxin resistant               | Nation and Li labs, Monash University                                                                           |
| <i>Pseudomonas aeruginosa</i>  | PA9704              | Clinical isolate, polymyxin resistant               | Wang Hengzhuang, University Hospital of Copenhagen, Denmark                                                     |
| <i>Acinetobacter baumannii</i> | Ptyela 100734512:2  | Clinical isolate, Carbapenem & polymyxin resistant  | Ilias Karaiskos and Helen Giamarellou (6th Dept. of Internal Medicine, Hygeia General Hospital, Athens, Greece) |
| <i>Klebsiella pneumoniae</i>   | Koprana 100650661:1 | Clinical isolate, Carbapenem, & polymyxin resistant | General Hospital, Athens, Greece                                                                                |
| <i>Klebsiella pneumoniae</i>   | 138-16357-20362     | Clinical isolate, Carbapenem, & polymyxin resistant | Cely S. Abboud (Instituto Dante Pazzanese de Cardiologia, São Paulo, Brazil)                                    |
| <i>Staphylococcus aureus</i>   | ATCC 25923          | MSSA (methicillin Susceptible <i>S. aureus</i> )    | ATCC                                                                                                            |



**Figure S1. Structures of Vancomycin and Gentamicin**

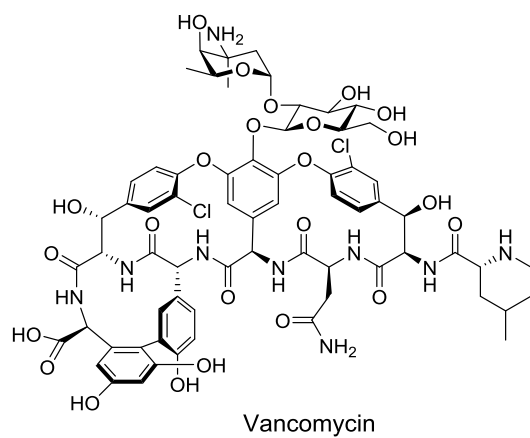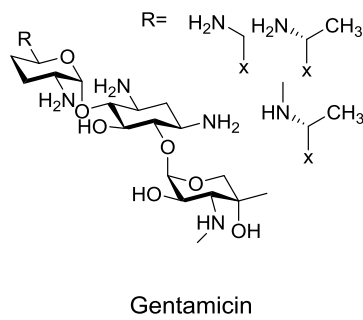

**Scheme S1. Synthesis example for compounds 18 and 19.**

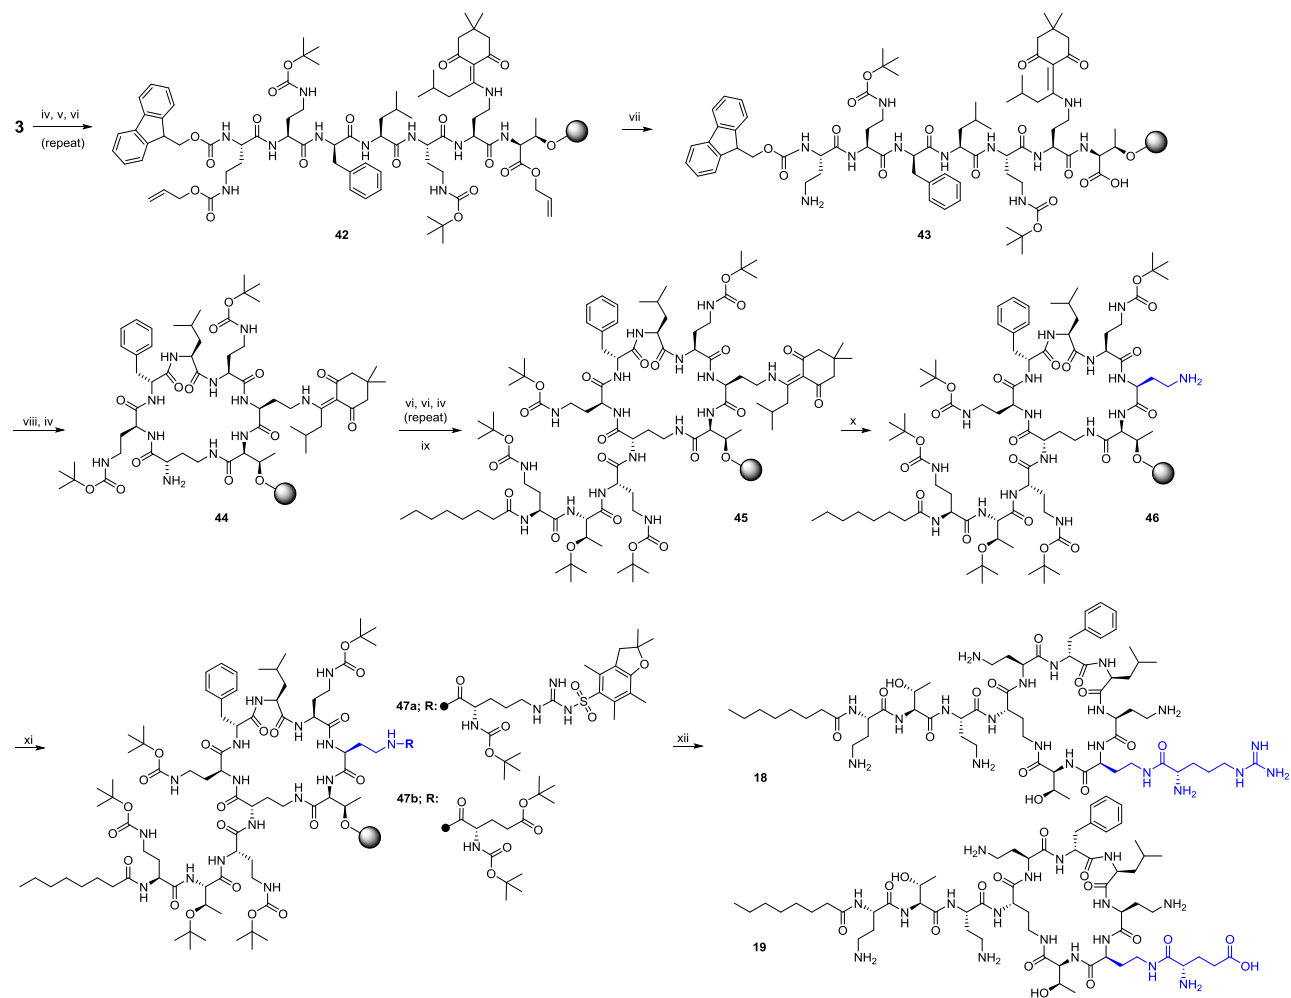

Reagent and conditions: (iv) 30% piperidine, DMF; (v) Solid-phase peptide synthesis (SPPS) with corresponding amino acid (See Table S3), HCTU, DIPEA; (vi) Acetic anhydride, pyridine (50/50, v/v); (vii) Pd(PPh<sub>3</sub>), PhSiH<sub>3</sub>; (viii) DPPA, DIPEA, DMF; (ix) nC<sub>7</sub>CO, HCTU, DIPEA; (x) 2% H<sub>2</sub>NNH<sub>2</sub> in DMF; (xi) Boc-Arg(Pbf)-OH or Boc-Glu(OtBu)-OH, HCTU, DIPEA; (xii) TFA/Et<sub>3</sub>SiH/H<sub>2</sub>O (95:1:4).

## Materials and Methods: Synthesis

All chemicals were obtained from commercial suppliers and used without further purification. All Fmoc  $\alpha$ -amino acids including *N*- $\alpha$ -Fmoc-*N*- $\gamma$ -Boc-L-2,4-diaminobutyric acid (Fmoc-L-Dab(Boc)-OH), *N*- $\alpha$ -(9-Fluorenylmethyloxycarbonyl)-*N*- $\gamma$ -[1-(4,4-dimethyl-2,6-dioxocyclohex-1-ylidene)-3-methylbutyl]-L-2,4-diaminobutyric acid (Fmoc-L-Dab(ivDde)-OH), *N*- $\alpha$ -(9-fluorenylmethyloxycarbonyl)-4-*t*-butyloxycarbonylamino-L-phenylalanine (Fmoc-L-Phe(4-NHBoc)-OH)), Fmoc-4-phenyl-L-phenylalanine (Fmoc-L-Bip(4,4')-OH), *N*- $\alpha$ -(9-fluorenylmethyloxycarbonyl)-DL-octylglycine (Fmoc-DL-OctGly-OH), *N*- $\alpha$ -Fmoc-*N*- $\gamma$ -Alloc-L-2,4-diaminobutyric acid (Fmoc-L-Dab(Alloc)-OH), *O*-(1H-6-chlorobenzotriazole-1-yl)-1,1,3,3-tetramethyluronium hexafluorophosphate (HCTU) were purchased from Chem-Impex International Inc. (Wood Dale, IL, USA). 3,4-Dihydro-2H-pyran-2-yl-methoxymethyl polystyrene resin (DHP HM resin 100 – 200 mesh) was purchased from Novabiochem (Merck). Peptide grade trifluoroacetic acid (TFA), piperidine, methanol and *N,N*-dimethylformamide (DMF) were purchased from AusPep (Melbourne, Australia). 2-Chlorophenyl isocyanate (2-CIPhNCO), biphenyl-4-carboxylic acid (Ph-4-PhCO), 4-phenoxybenzoic acid (Ph-4-OPhCO), 4-biphenyl isocyanate (Ph-4-PhNCO), octanoic acid (nC7CO), pyridine, acetic anhydride, triethylsilane (Et<sub>3</sub>SiH) and diisopropylethylamine (DIPEA), tetrakis(triphenylphosphine)palladium(0) (Pd[PPh<sub>3</sub>]<sub>4</sub>), diphenyl phosphoryl azide (DPPA) and phenylsilane (PhSiH<sub>3</sub>), allyl bromide, hydrazine (H<sub>2</sub>NNH<sub>2</sub>), sodium diethyl dithiocarbamate trihydrate (C<sub>2</sub>H<sub>5</sub>)<sub>2</sub>NCSSNa  $\times$  3H<sub>2</sub>O and anhydrous 1,2-dichloroethane (DCE) were purchased from Sigma-Aldrich. Gentamicin sulfate (G1914), Polymyxin B sulfate (P0972) and vancomycin hydrochloride hydrate (861987) were purchased from Sigma-Aldrich (Sydney, Australia). Cesium carbonate and pyridinium *p*-toluenesulfonate (PPTS) were purchased from AK Scientific (Union City, CA). All other solvents were HPLC grade and all chemicals were used without further purification. LC-MS analysis were conducted using Agilent Technologies 1200 Series Instrument with a G1316A variable wavelength detector set at  $\lambda$ = 210 nm, 1200 Series ELSD, 6110 quadrupole ESI-MS, using an Agilent Eclipse XDB-Phenyl column (3  $\times$  100mm, 3.5  $\mu$ m particle size, flow rate 1 mL/min, the mobile phases 0.05% formic acid in water and 0.05% formic acid in acetonitrile). Compound purification was done using an Agilent 1260 Infinity Preparative HPLC with a G1365D multiple wavelength detector set at  $\lambda$ = 210 nm and an Agilent Eclipse XDB-Phenyl column 21.2 x 100mm, 5  $\mu$ m particle

size. Ultraviolet/visible spectra were recorded with a Varian Cary 50 Bio spectrophotometer. Identities of final products were confirmed by MS/MS spectra, obtained using an API QSTAR™ Pulsar Hybrid LC-MS/MS System, high resolution mass spectrometry (HRMS), performed on a Bruker Micro TOF mass spectrometer using (+)-ESI calibrated to sodium formate, and by <sup>1</sup>H (600 MHz) and 2D NMR spectra, obtained using a Bruker Avance-600 spectrometer equipped with a TXI cryoprobe in D<sub>2</sub>O, referenced externally with NaOAc<sup>66</sup> ( $\delta_{\text{H}}$  1.90 and 8.44; 10 mg in 500  $\mu\text{L}$  D<sub>2</sub>O) and then internally with the HDO resonance at  $\delta$  4.77. Final purity of more than 95% for all compounds was confirmed by LCMS analysis using both ELSD and UV (210 nm) detection.

Fmoc-L-Thr-OAllyl (4; Scheme 1): A solution of Cs<sub>2</sub>CO<sub>3</sub> in H<sub>2</sub>O (2.5 g in 10 mL, 25% w/v) was added dropwise to a solution of commercially available Fmoc-L-Thr-OH (3) (2.0 g, MW 341.36, 5.86 mmol) in MeOH (300 mL) and H<sub>2</sub>O (60 mL) to pH 7-8. The solution was concentrated under vacuum to evaporate most of the MeOH, the resulting mixture was diluted with H<sub>2</sub>O and lyophilized to obtain the cesium salt as a white fluffy powder. The crude cesium salt was treated with a solution of allyl bromide (545  $\mu\text{L}$ , d 1.43, MW 120.98, 6.44 mmol, 1.1 equiv) in dry DMF (15 mL) inside a glove box. The resulting suspension became thick and was stirred at rt under nitrogen overnight. The solvent was removed under vacuum and the residue was dissolved in ethyl acetate (50 mL) and washed with 10% aqueous citric acid (2  $\times$  50 mL). The organic layer was separated, dried over MgSO<sub>4</sub> and evaporated under vacuum. The crude product was purified by column chromatography (2.5-5% MeOH in DCM) to afford compound 4 (2.2 g, 98.6% yield) as a white solid. LCMS (ESI+): 382.43 (M + H)<sup>+</sup>. <sup>1</sup>H NMR (400 MHz, CDCl<sub>3</sub>)  $\delta$  1.28 (d,  $J$  = 5.9 Hz, 3H) 4.26 (t,  $J$  = 6.9 Hz, 1H) 4.33-4.42 (m, 2H) 4.44 (d,  $J$  = 7.0 Hz, 2H) 4.70 (d,  $J$  = 5.6 Hz, 2H) 5.22-5.31 (m, 1H) 5.36 (d,  $J$  = 17.0 Hz, 1 H) 5.59 (d,  $J$  = 8.8 Hz, 1H) 5.93 (ddt,  $J$  = 16.9, 11.1, 5.6 Hz, 1H) 7.29-7.38 (m, 2H) 7.38-7.48 (m, 2H) 7.57-7.68 (m, 2H) 7.78 (d,  $J$  = 7.3 Hz, 2H).

DHP-Resin Fmoc-L-Thr-OAllyl (5; Scheme 1): A solution of PPTS (1.26 g, MW 251.30, 5.0 mmol, 0.5 eq) in dry DCE (80 mL) was added to compound 4 (15.26 g, MW 381.43, 40 mmol, 4 equiv) in a glove box. The resulting solution was added to DHP polystyrene resin (12.5 g, loading 0.8 mmol/g, 10 mmol) in a round bottom flask. The mixture was heated at 80 °C for four days without agitation, and then allowed to cool to rt. The reaction was quenched with dry pyridine (811  $\mu\text{L}$ , 10 mmol, 1 eq.). The resin was filtered under vacuum, washed with DMF ( $\times$  3), MeOH ( $\times$  3) and DCM ( $\times$  3), and dried under high vacuum overnight to provide resin 5 with 0.62 mmol/g,

determined by Fmoc removal and subsequent UV detection of liberated dibenzofulvene-piperidine adduct. The bulk resin was divided in labeled polypropylene SPE tubes with PE frits (6 mL), 100 mg of resin (**5**) in each tube.

DHP-Resin NH-L-Thr-OAllyl (**6**; Scheme 1): Fmoc protected resin **5** (100 mg, loading 0.62 mmol/g) was treated with a solution of 30% piperidine in DMF (2 mL) and shaken at rt for 15 min. The Fmoc deprotected resin **6** was drained and washed with DMF ( $\times 3$ ), MeOH ( $\times 3$ ) and DCM ( $\times 3$ ). The deprotection step was repeated.

General method for Peptide Coupling (Compound 5 in Scheme 1 as example): A solution of the corresponding amino acid (see **Table S3** for amounts; 0.14 mmol, 2 eq.), DMF (0.29 mL), HCTU (0.5 M in DMF, 0.29 mL, 0.14 mmol, 2 eq.) and DIPEA (50  $\mu$ L, 0.14 mmol, 4 eq.) was reacted for 1 min and then added to the deprotected resin **6** (100 mg; TL: 0.62 mmol/g). The resin was shaken for 30 min and then washed with DMF ( $\times 3$ ), MeOH ( $\times 3$ ) and DCM ( $\times 3$ ). The coupling step was repeated. An analytical sample was cleaved with TFA/Et<sub>3</sub>SiH/H<sub>2</sub>O (95:1:4) followed by LCMS analysis to confirm coupling with corresponding amino acid.

General method for O-Allyl/N-Alloc deprotection (Compound 6 to 7 in Scheme 1 as example): The corresponding O-Allyl / N-Alloc protected heptapeptide DHP-resin **6** (100 mg, 0.62 mmol) was washed with dry DCM ( $\times 3$ ). A solution of Pd(PPh<sub>3</sub>)<sub>4</sub> (MW 1155.6, 215 mg, 0.186 mmol, 0.25 equiv) in dry DCM (2 mL) was added to the resin followed by phenylsilane (MW 108.21, d 0.878, 2.19 mL, 17.76 mmol, 24 equiv). The resin was carefully shaken and the excess pressure was released several times until no increase in pressure was observed. The resin was then shaken at rt for 2 h, drained and washed with 0.5% DIPEA in DCM ( $\times 5$ ), 0.5% w/v sodium diethyl dithiocarbamate trihydrate in DMF ( $\times 8$ ), MeOH ( $\times 3$ ) and DCM ( $\times 3$ ) and dried under vacuum. An analytical sample was cleaved using TFA/Et<sub>3</sub>SiH/H<sub>2</sub>O (95:1:4) followed by LCMS analysis to confirm complete *bis*-deprotection.

General method for DHP-resin cyclization (Compound 7 to 8 in Scheme 1 as example): The O-Allyl / N-Alloc deprotected resin **7** (100 mg) was washed with DCM ( $\times 3$ ) and DMF ( $\times 3$ ) and then treated with a solution of DPPA (MW 275.2, d 1.277, 5.0 equiv) and DIPEA (10 equivalents) in DMF (2 mL). The resin was shaken at room temperature overnight, drained and washed with DMF

( $\times 3$ ), MeOH ( $\times 3$ ) and DCM ( $\times 3$ ). An analytical sample was cleaved using TFA/Et<sub>3</sub>SiH/H<sub>2</sub>O (95:1:4) followed by LCMS analysis to confirm complete cyclization.

General method for Fatty Acid Coupling: A solution of the corresponding fatty acid (see **Table S3** for amounts; 0.14 mmol, 2 equiv), DMF (0.29 mL), HCTU (0.5 M in DMF, 0.29 mL, 0.14 mmol, 2 eq.) and DIPEA (50  $\mu$ L, 0.14 mmol, 4 equiv) was reacted for 1 min and then added to the deprotected resin **9** (100 mg; TL: 0.62 mmol/g). The resin was shaken for 30 min and then washed with DMF ( $\times 3$ ), MeOH ( $\times 3$ ) and DCM ( $\times 3$ ). An analytical sample was cleaved with TFA/Et<sub>3</sub>SiH/H<sub>2</sub>O (95:1:4) followed by LCMS analysis to confirm coupling.

DHP resin cleavage: A solution of TFA/Et<sub>3</sub>SiH/H<sub>2</sub>O (95:1:4) was added to the resin and the reaction vessel was shaken for 30 min at room temperature. The solvent was captured in a 20 mL vial, the resin was then washed with DCM ( $\times 3$ ), THF ( $\times 3$ ) and DCM ( $\times 3$ ) and all the fractions were combined to be evaporated under a stream of nitrogen. The crude peptides were dissolved in 5 mL of acetonitrile/water (50/50, v/v) and the samples were freeze dried.

General method for ivDde removal (*Scheme 2 as example*): A solution of 2% hydrazine hydrate in DMF (2 mL) was added to the reaction vessel containing the corresponding resin for peptides **18d**, **19d**, **22d**, **23d**, **31d** and **32d** (100 mg each). The reaction vessel was shaken for 1 h at rt, the solvent was drained and fresh 2% hydrazine hydrate in DMF (2 mL) was added and the vessel shaken for an extra hour at rt. The solvent was drained, washed with DMF ( $\times 3$ ), MeOH ( $\times 3$ ), and DCM ( $\times 3$ ) and dried under vacuum. An analytical sample was cleaved using TFA/Et<sub>3</sub>SiH/H<sub>2</sub>O (95:1:4) followed by LCMS analysis to confirm complete deprotection.

General method for L-Arg and L-Glu coupling (*Scheme 2 as example*): A solution of the corresponding amino acid (Boc-Arg(Pbf)-OH, Boc-Glu(OtBu)-OH; 0.14 mmol, 2 eq.), DMF (0.29 mL), HCTU (0.5 M in DMF, 0.29 mL, 0.14 mmol, 2 equiv) and DIPEA (50  $\mu$ L, 0.14 mmol, 4 equiv) was reacted for 1 min and then added to the deprotected resin (100 mg; TL: 0.62 mmol/g). The resin was shaken for 30 min and then washed with DMF ( $\times 3$ ), MeOH ( $\times 3$ ) and DCM ( $\times 3$ ). The coupling step was repeated. An analytical sample was cleaved with TFA/Et<sub>3</sub>SiH/H<sub>2</sub>O (95:1:4) and the coupling was monitored by LCMS analysis to confirm product.

Compound **10** (*Scheme 1*): The crude product (39 mg) was dissolved in 2 mL acetonitrile:H<sub>2</sub>O (1:1) and separated using an Agilent 1260 Infinity Prep HPLC on an Agilent Eclipse XDB-Phenyl

21.2 × 100 mm 5 μm column (flow 20 mL/min, mobile phase A = 0.05% formic acid in water and B = 0.05% formic acid in acetonitrile, gradient 5→100% B over 20 min) and then lyophilized. The compound as a formate salt was converted to TFA by re-dissolving the compound with 0.1% TFA in acetonitrile:water (1:1) (concentration of 0.5 mg/mL) and lyophilized to give a white powder (6.5 mg, 17% yield). LC-UV purity: >95%. LC-ELSD purity: >95%. <sup>1</sup>H NMR (500 MHz, D<sub>2</sub>O) δ 7.88 (d, *J* = 8.4 Hz, 2H), 7.80 (d, *J* = 8.4 Hz, 2H), 7.73 (d, *J* = 7.5 Hz, 2H), 7.52 (dd, *J* = 7.5, 7.5 Hz, 1H), 7.34 (dd, *J* = 7.5, 7.5 Hz, 2H), 7.30 (dd, *J* = 7.5, 7.5 Hz, 1H), 7.20 (d, *J* = 7.5 Hz, 2H), 4.70 (dd, *J* = 5.3, 9.5 Hz, 1H), 4.53 (t, *J* = 8.2 Hz, 1H), 4.45 (dd, *J* = 5.2, 9.5 Hz, 1H), 4.42 (dd, *J* = 5.2, 9.0 Hz, 1H), 4.38 (d, *J* = 4.4 Hz, 1H), 4.25–4.16 (m, 6H), 4.14 (d, *J* = 4.6 Hz, 1H), 3.29 (ddd, *J* = 7.6, 7.6, 13.9 Hz, 1H), 3.20–3.00 (m, 13H), 2.82 (ddd, *J* = 4.9, 10.1, 12.7 Hz, 1H), 2.73 (ddd, *J* = 6.1, 9.8, 12.7 Hz, 1H), 2.32 (m, 1H), 2.26–1.79 (m, 11H), 1.45 (ddd, *J* = 4.0, 9.7, 14.0 Hz, 1H), 1.36 (ddd, *J* = 3.9, 11.1, 14.0 Hz, 1H), 1.19 (d, *J* = 6.5 Hz, 3H), 1.13 (d, *J* = 6.5 Hz, 3H), 0.79 (m, 1H), 0.72 (d, *J* = 6.5 Hz, 3H), 0.65 (d, *J* = 6.5 Hz, 3H). MS-ESI (*m/z*) 1243.8 [M + H]<sup>+</sup>, 622.4 [M + 2H]<sup>2+</sup>, 415.3 [M + 3H]<sup>3+</sup>. HRMS-ESI (*m/z*): [M + 2H]<sup>2+</sup> calcd for (C<sub>60</sub>H<sub>90</sub>N<sub>16</sub>O<sub>13</sub> + 2H)/2, 622.3509; found 622.3512.

**Compound 14:** The crude product (34 mg) was dissolved in 2 mL acetonitrile:water (1:1) and separated using a Agilent 1260 Infinity Prep HPLC on an Agilent Eclipse XDB-Phenyl 21.2 × 100 mm 5 μm column (flow 20 mL/min, mobile phases A = 0.05% formic acid in water and B = 0.05% formic acid in acetonitrile, gradient 5→100% B over 20 min) and then lyophilized. The pure compound 14 as a formate salt was converted to TFA salt by re-dissolving it with 0.1% TFA in ACN: H<sub>2</sub>O (1:1) (concentration of 0.5 mg/mL) and lyophilized to give a white powder (7.5 mg, 22% yield). LC-UV purity: >95%. LC-ELSD purity: >95%. <sup>1</sup>H NMR (500 MHz, D<sub>2</sub>O) δ 7.89 (d, *J* = 8.8 Hz, 2H), 7.44 (dd, *J* = 7.6, 8.8 Hz, 2H), 7.35 (dd, *J* = 7.5, 7.5 Hz, 2H), 7.30 (dd, *J* = 7.5, 7.5 Hz, 1H), 7.25 (dd, *J* = 7.6, 7.6 Hz, 1H), 7.22 (d, *J* = 7.5 Hz, 2H), 7.12 (d, *J* = 7.6 Hz, 2H), 7.08 (d, *J* = 8.8 Hz, 2H), 4.66 (dd, *J* = 5.3, 9.5 Hz, 1H), 4.54 (t, *J* = 8.2 Hz, 1H), 4.45 (t, *J* = 5.5 Hz, 1H), 4.40 (t, *J* = 5.6 Hz, 1H), 4.35 (d, *J* = 4.4 Hz, 1H), 4.25–4.16 (m, 6H), 4.15 (d, *J* = 4.7 Hz, 1H), 3.28 (ddd, *J* = 7.6, 7.6, 13.9 Hz, 1H), 3.15–3.03 (m, 13H), 2.82 (ddd, *J* = 4.9, 10.1, 12.7 Hz, 1H), 2.73 (ddd, *J* = 6.1, 9.8, 12.7 Hz, 1H), 2.32–1.79 (m, 12H), 1.45 (ddd, *J* = 4.0, 9.7, 14.0 Hz, 1H), 1.37 (ddd, *J* = 3.9, 11.1, 14.0 Hz, 1H), 1.17 (d, *J* = 6.5 Hz, 3H), 1.14 (d, *J* = 6.4 Hz, 3H), 0.79 (m, 1H), 0.73 (d, *J* = 6.5 Hz, 3H), 0.66 (d, *J* = 6.4 Hz, 3H). MS-ESI (*m/z*) 1259.8 [M + H]<sup>+</sup>, 630.4 [M + 2H]<sup>2+</sup>, 420.5 [M

+ 3H]<sup>3+</sup>. HRMS-ESI (*m/z*): [M + 2H]<sup>2+</sup> calcd for (C<sub>60</sub>H<sub>90</sub>N<sub>16</sub>O<sub>14</sub> + 2H)/2, 630.3484; found 630.3487.

**Compound 15:** The crude product (40 mg) was dissolved in 2 mL acetonitrile:water (1:1) and separated using a Agilent 1260 Infinity Prep HPLC on an Agilent Eclipse XDB-Phenyl 21.2 × 100 mm 5 μm column (flow 20 mL/min, mobile phases A = 0.05% formic acid in water and B = 0.05% formic acid in acetonitrile, gradient 5→100% B over 20 min) and then lyophilized. The final compound **15** as a formate salt was converted to TFA salt by re-dissolving it with 0.1% TFA in ACN: H<sub>2</sub>O (1:1) (concentration of 0.5 mg/mL) and lyophilized to give a white powder (7.5 mg, 18% yield). LC-UV purity: >95%. LC-ELSD purity: >95%. <sup>1</sup>H NMR (500 MHz, D<sub>2</sub>O) δ 7.66 (d, *J* = 8.5 Hz, 2H), 7.65 (d, *J* = 8.5 Hz, 2H), 7.48 (dd, *J* = 7.5, 7.5 Hz, 2H), 7.39 (dd, *J* = 7.5, 7.5 Hz, 1H), 7.34 (dd, *J* = 7.5, 7.5 Hz, 2H), 7.29 (dd, *J* = 7.5, 7.5 Hz, 1H), 7.20 (d, *J* = 7.5 Hz, 2H), 4.53 (t, *J* = 8.2 Hz, 1H), 4.42 (dd, *J* = 5.2, 9.2 Hz, 2H), 4.41 (dd, *J* = 5.0, 9.7 Hz, 1H), 4.36 (d, *J* = 4.5 Hz, 1H), 4.27–4.16 (m, 6H), 4.14 (d, *J* = 4.7 Hz, 1H), 3.29 (ddd, *J* = 7.6, 7.6, 13.9 Hz, 1H), 3.15–2.99 (m, 13H), 2.80 (ddd, *J* = 4.9, 10.1, 12.7 Hz, 1H), 2.71 (ddd, *J* = 6.1, 9.8, 12.7 Hz, 1H), 2.29–1.76 (m, 12H), 1.45 (ddd, *J* = 4.0, 9.7, 14.0 Hz, 1H), 1.37 (ddd, *J* = 3.9, 11.1, 14.0 Hz, 1H), 1.20 (d, *J* = 6.6 Hz, 3H), 1.12 (d, *J* = 6.3 Hz, 3H), 0.80 (m, 1H), 0.73 (d, *J* = 6.5 Hz, 3H), 0.66 (d, *J* = 6.5 Hz, 3H). MS-ESI (*m/z*) 1258.9 [M + H]<sup>+</sup>, 629.9 [M + 2H]<sup>2+</sup>, 420.3 [M + 3H]<sup>3+</sup>. HRMS-ESI (*m/z*): [M + 2H]<sup>2+</sup> calcd for (C<sub>60</sub>H<sub>91</sub>N<sub>17</sub>O<sub>13</sub> + 2H)/2, 629.8564; found 629.8594.

**Compound 38:** The crude product (42 mg) was dissolved in 2 mL acetonitrile:H<sub>2</sub>O (1:1) and separated using a Agilent 1260 Infinity Prep HPLC on an Agilent Eclipse XDB-Phenyl 21.2 × 100 mm 5 μm column (flow 20 mL/min, mobile phases A = 0.1% TFA in water and B = 0.1% TFA in acetonitrile, gradient 5→100% B over 20 min) and then lyophilized to give a white powder (6.1 mg, 15% yield). LC-UV purity: >95%. LC-ELSD purity: >95%. <sup>1</sup>H NMR (500 MHz, D<sub>2</sub>O) δ 7.35 (dd, *J* = 7.5, 7.5 Hz, 2H), 7.30 (dd, *J* = 7.5, 7.5 Hz, 1H), 7.22 (d, *J* = 7.5 Hz, 2H), 4.53 (t, *J* = 8.3 Hz, 1H), 4.47 (dd, *J* = 5.2, 9.3 Hz, 1H), 4.46 (dd, *J* = 5.3, 9.1 Hz, 1H), 4.32 (d, *J* = 4.0 Hz, 1H), 4.26–4.21 (m, 4H), 4.18 (dq, d, *J* = 6.2, 6.2 Hz, 1H), 4.15 (m, 1H), 4.14 (d, *J* = 5.0 Hz, 1H), 3.95 (s, 2H), 3.33 (ddd, *J* = 7.6, 7.6, 13.9 Hz, 1H), 3.13–2.99 (m, 13H), 2.85 (ddd, *J* = 4.9, 10.1, 12.7 Hz, 1H), 2.76 (ddd, *J* = 6.1, 9.8, 12.7 Hz, 1H), 2.28 (t, *J* = 7.4 Hz, 2H), 2.28–1.81 (m, 12H), 1.56 (tt, *J* = 7.4, 7.4 Hz, 2H), 1.44 (ddd, *J* = 4.0, 9.7, 14.0 Hz, 1H), 1.37 (ddd, *J* = 3.9, 11.1, 14.0 Hz, 1H), 1.26–1.20 (m, 8H), 1.17 (d, *J* = 6.5 Hz, 3H), 1.15 (d, *J* = 6.5 Hz, 3H), 0.81 (t, *J* = 7.0 Hz, 3H), 0.77 (m, 1H), 0.72



(d,  $J = 6.3$  Hz, 3H), 0.65 (d,  $J = 6.2$  Hz, 3H). MS-ESI ( $m/z$ ) 1146.7  $[M + H]^+$ , 573.8  $[M + 2H]^{2+}$ , 382.9  $[M + 3H]^{3+}$ . HRMS-ESI ( $m/z$ ):  $[M + 2H]^{2+}$  calcd for  $(C_{53}H_{91}N_{15}O_{13} + 2H)/2$ , 573.8533; found 573.8547.

**Table S3. Summary of amino acids and the calculated amounts.**

| Position    | Coupling Condition | Amino acid / Fatty acid   | MW     | eq | N | mmol | amount (mg) | DMF (μL) | HCTU (μL 0.5M) | DIPEA (μL) |
|-------------|--------------------|---------------------------|--------|----|---|------|-------------|----------|----------------|------------|
| P9          | a                  | Fmoc-Dab(Boc)-OH          | 440.49 | 2  | 1 | 0.14 | 63          | 288      | 288            | 50         |
|             | b                  | Fmoc-Dab(ivDde)-OH        | 546.65 | 2  | 1 | 0.14 | 79          | 288      | 288            | 50         |
|             | c                  | Fmoc-Phe(4-NHBoc)-OH      | 502.57 | 2  | 1 | 0.14 | 72          | 288      | 288            | 50         |
|             | d                  | Fmoc-Arg(Pfb)-OH          | 648.77 | 2  | 1 | 0.14 | 93          | 288      | 288            | 50         |
| P8          | a                  | Fmoc-Dab(Boc)-OH          | 440.49 | 2  | 1 | 0.14 | 63          | 288      | 288            | 50         |
|             | b                  | Fmoc-Dab(ivDde)-OH        | 546.65 | 2  | 1 | 0.14 | 79          | 288      | 288            | 50         |
|             | c                  | Fmoc-Arg(Pfb)-OH          | 648.77 | 2  | 1 | 0.14 | 93          | 288      | 288            | 50         |
|             | d                  | Fmoc-HomoSer(Trt)-OH      | 583.68 | 2  | 1 | 0.14 | 84          | 288      | 288            | 50         |
|             | e                  | Fmoc-Phe(4-NHBoc)-OH      | 502.57 | 2  | 1 | 0.14 | 72          | 288      | 288            | 50         |
| P7          | a                  | Fmoc-Leu-OH               | 353.40 | 2  | 1 | 0.14 | 51          | 288      | 288            | 50         |
|             | b                  | Fmoc-Bip(4,4')-OH         | 463.53 | 2  | 1 | 0.14 | 67          | 288      | 288            | 50         |
|             | c                  | Fmoc-DL-OctGly-OH         | 409.52 | 2  | 1 | 0.14 | 59          | 288      | 288            | 50         |
| P6          | a                  | Fmoc-D-Phe-OH             | 387.43 | 2  | 1 | 0.14 | 56          | 288      | 288            | 50         |
|             | b                  | Fmoc-D-Bip(4,4')-OH       | 463.53 | 2  | 1 | 0.14 | 67          | 288      | 288            | 50         |
|             | c                  | Fmoc-DL-OctGly-OH         | 409.52 | 2  | 1 | 0.14 | 59          | 288      | 288            | 50         |
| P5          | a                  | Fmoc-Dab(Boc)-OH          | 440.49 | 2  | 1 | 0.14 | 63          | 288      | 288            | 50         |
|             | b                  | Fmoc-Dab(ivDde)-OH        | 546.65 | 2  | 1 | 0.14 | 79          | 288      | 288            | 50         |
|             | c                  | Fmoc-HomoSer(Trt)-OH      | 583.68 | 2  | 1 | 0.14 | 84          | 288      | 288            | 50         |
|             | d                  | Fmoc-Phe(4-NHBoc)-OH      | 502.57 | 2  | 1 | 0.14 | 72          | 288      | 288            | 50         |
|             | e                  | Fmoc-Arg(Pfb)-OH          | 648.77 | 2  | 1 | 0.14 | 93          | 288      | 288            | 50         |
| P4          |                    | Fmoc-Dab(Alloc)-OH        | 424.45 | 2  | 1 | 0.14 | 61          | 288      | 288            | 50         |
| P3          | a                  | Fmoc-Dab(Boc)-OH          | 440.49 | 2  | 1 | 0.14 | 63          | 288      | 288            | 50         |
|             | b                  | Fmoc-D-Dab(Boc)-OH        | 440.49 | 2  | 1 | 0.14 | 63          | 288      | 288            | 50         |
|             | c                  | Fmoc-D-Ser(tBu)-OH        | 383.4  | 2  | 1 | 0.14 | 55          | 288      | 288            | 50         |
|             | d                  | Fmoc-Gly-OH               | 297.3  | 2  | 1 | 0.14 | 43          | 288      | 288            | 50         |
|             | e                  | Fmoc-Thr(tBu)-OH          | 397.48 | 2  | 1 | 0.14 | 57          | 288      | 288            | 50         |
| P2          | a                  | Fmoc-Dab(Boc)-OH          | 440.49 | 2  | 1 | 0.14 | 63          | 288      | 288            | 50         |
|             | b                  | Fmoc-Thr(tBu)-OH          | 397.48 | 2  | 1 | 0.14 | 57          | 288      | 288            | 50         |
| P1          | a                  | Fmoc-Dab(Boc)-OH          | 440.49 | 2  | 1 | 0.14 | 63          | 288      | 288            | 50         |
|             | b                  | Fmoc-D-Dab(Boc)-OH        | 440.49 | 2  | 1 | 0.14 | 63          | 288      | 288            | 50         |
|             | c                  | Fmoc-Gly-OH               | 297.3  | 2  | 1 | 0.14 | 43          | 288      | 288            | 50         |
| Fatty Acids |                    | nC7CO <sub>2</sub> H      | 144.21 | 2  | 1 | 0.14 | 21          | 288      | 0.288          | 50         |
|             |                    | Ph-4-PhCO <sub>2</sub> H  | 198.07 | 2  | 1 | 0.14 | 29          | 288      | 0.288          | 50         |
|             |                    | PhO-4-PhCO <sub>2</sub> H | 214.06 | 2  | 1 | 0.14 | 31          | 288      | 0.288          | 50         |
|             |                    | Ph-4-PhNCO                | 195.22 | 2  | 1 | 0.14 | 28          | 288      | 0.288          | 50         |
|             |                    | 2-ClPhNCO                 | 153.57 | 2  | 1 | 0.14 | 22          | 288      | 0.288          | 50         |

All amino acids are L-isomers unless otherwise indicated.

Fmoc-Dab(Boc)-OH = *N*-α-Fmoc-*N*-γ-Boc-L-2,4-diaminobutyric acid

Fmoc-Dab(ivDde)-OH = *N*-α-Fmoc-*N*-γ-[1-(4,4-dimethyl-2,6-dioxocyclohex-1-ylidene)-3-methylbutyl]-L-2,4-diaminobutyric acid

(Fmoc-Phe(4-NHBoc)-OH) = *N*-α-Fmoc-4-*t*-butyloxycarbonylamino-L-phenylalanine

Fmoc-Bip(4,4')-OH = Fmoc-4-phenyl-L-phenylalanine

Fmoc-DL-OctGly-OH = *N*-α-Fmoc-DL-octylglycine

Fmoc-Dab(Alloc)-OH = *N*-α-Fmoc-*N*-γ-Alloc-L-2,4-diaminobutyric acid

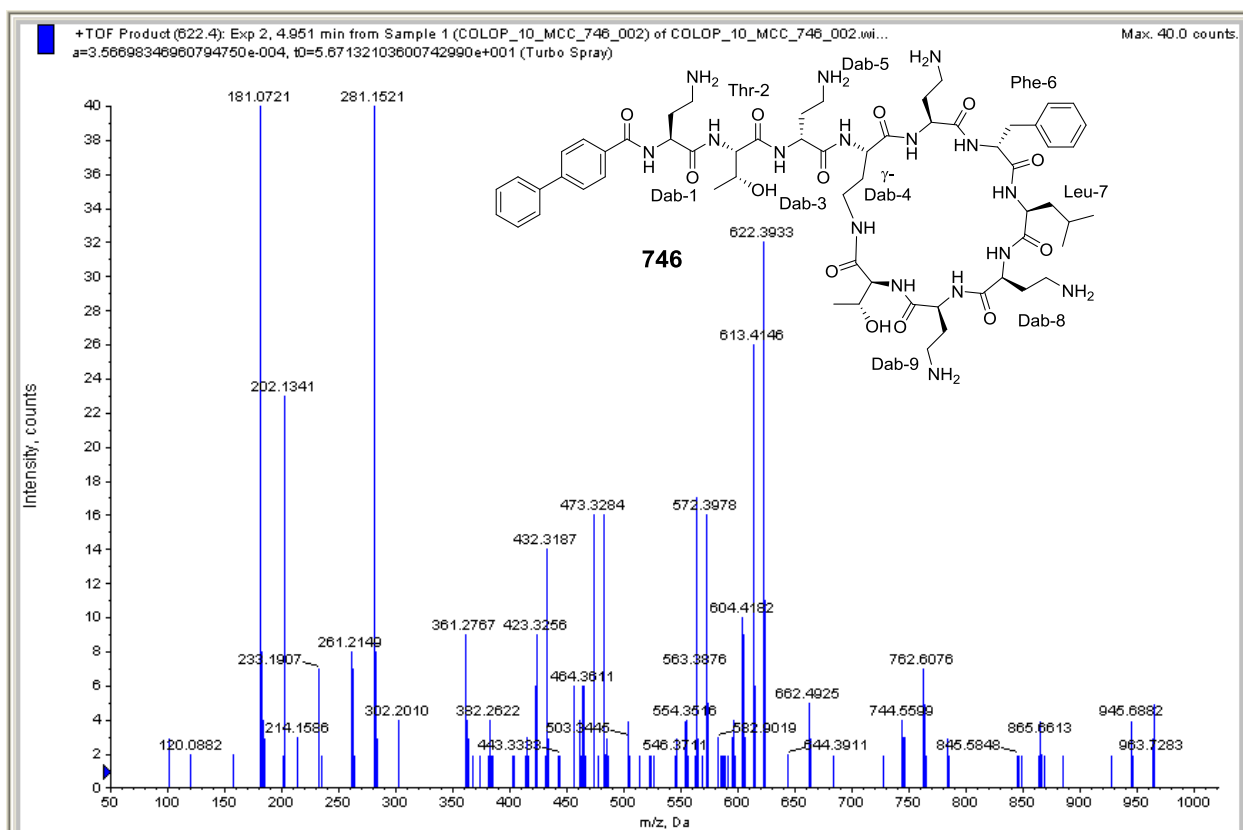

MCC746

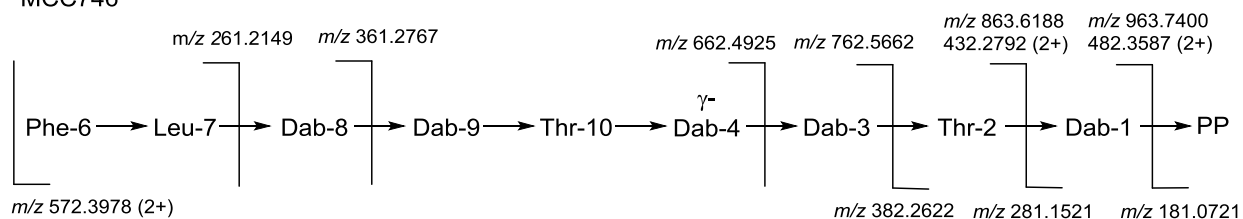

Other fragments:  
 Dab-Leu-Thr  $m/z$  302.2010  
 Dab-Thr  $m/z$  202.1341

**Figure S2a.** (+)-ESI-TOF-MS/MS fragmentation assignments of compound 10 from fragmentation of the  $[M+2H]^{2+}$  mass ion peak at  $m/z$  622.4, which were consistent with those previously reported for other polymyxins.<sup>1-3</sup>

## Mass Spectrum Molecular Formula Report

### Analysis Info

|               |                                                      |                   |                      |
|---------------|------------------------------------------------------|-------------------|----------------------|
| Analysis Name | D:\Data\cooper\MCC_000746_002_RA4_01_8660.d          | Acquisition Date  | 9/19/2014 4:37:32 PM |
| Method        | tune-wide_50ul_hystar_withcal_direct_medhighmass_2.m | Operator          | a.piggott            |
| Sample Name   | MCC_000746_002                                       | Instrument / Ser# | micrOTOF 232         |
| Comment       | Comments                                             |                   |                      |

### Acquisition Parameter

|             |            |                      |          |                  |           |
|-------------|------------|----------------------|----------|------------------|-----------|
| Source Type | ESI        | Ion Polarity         | Positive | Set Nebulizer    | 0.8 Bar   |
| Focus       | Not active |                      |          | Set Dry Heater   | 180 °C    |
| Scan Begin  | 100 m/z    | Set Capillary        | 4500 V   | Set Dry Gas      | 5.0 l/min |
| Scan End    | 1500 m/z   | Set End Plate Offset | -500 V   | Set Divert Valve | Source    |

### Generate Molecular Formula Parameter

|                  |              |                        |        |         |   |
|------------------|--------------|------------------------|--------|---------|---|
| Formula, min.    | C60H92N16O13 |                        |        |         |   |
| Formula, max.    | C60H92N16O13 |                        |        |         |   |
| Measured m/z     | 622.351      | Tolerance              | 10 mDa | Charge  | 2 |
| Check Valence    | no           | Minimum                | 0      | Maximum | 0 |
| Nitrogen Rule    | yes          | Electron Configuration | both   |         |   |
| Filter H/C Ratio | yes          | Minimum                | 0      | Maximum | 3 |
| Estimate Carbon  | yes          |                        |        |         |   |

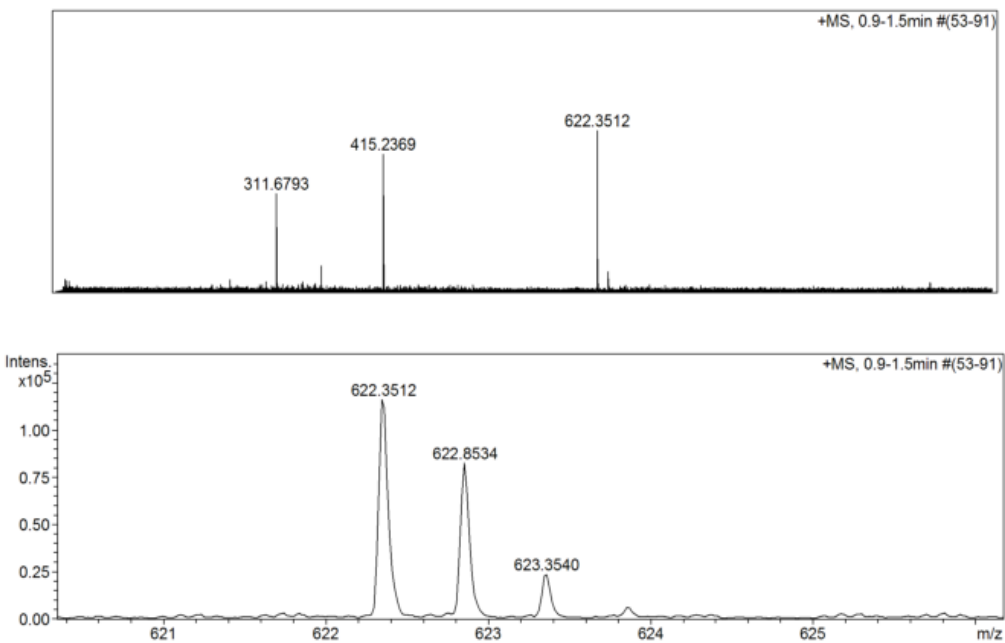

Figure S2b. HR-(+)-ESI-TOF-MS of the  $[M+2H]^{2+}$  mass ion peak of compound 10.

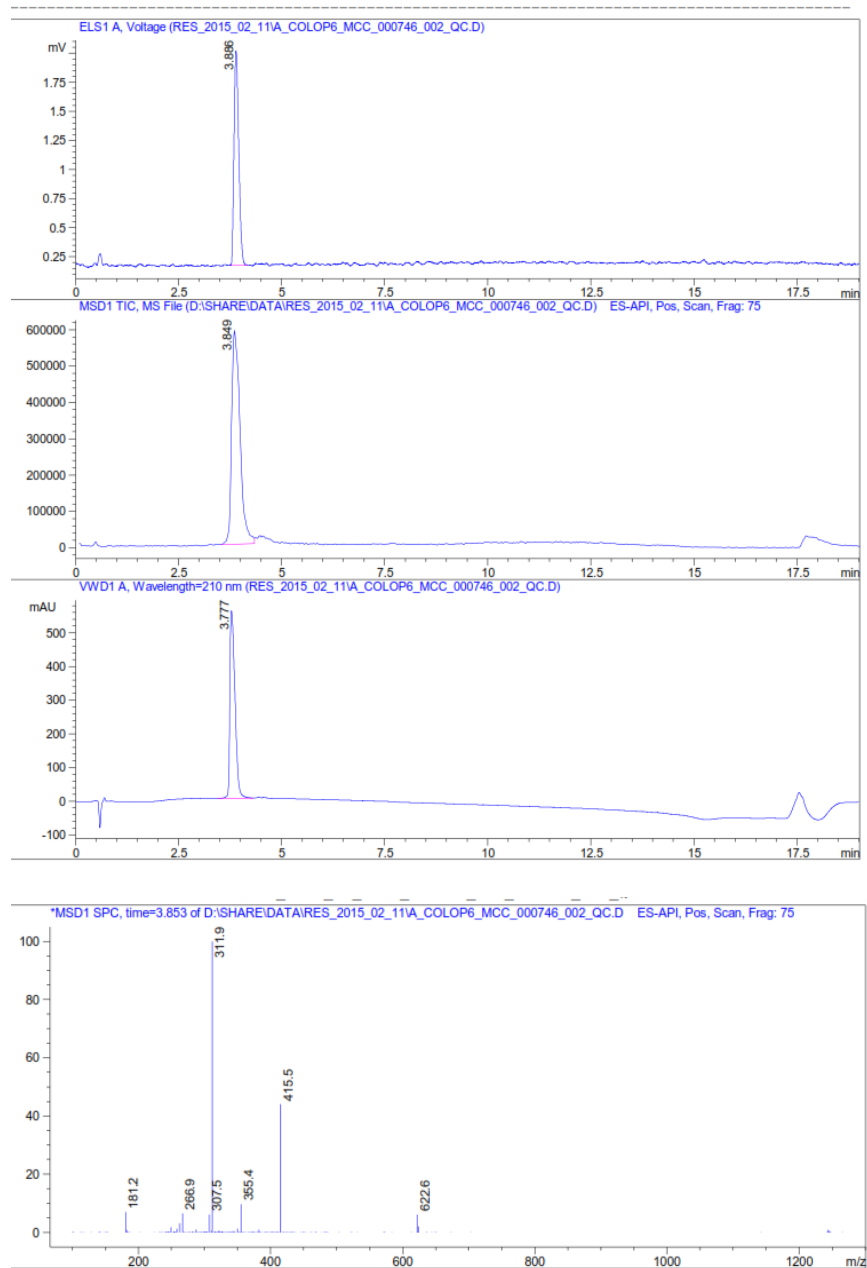

**Figure S2c.** LC-MS analysis of compound **10** showing ELSD, TIC, UV-vis absorption at 210 nm and ESI-MS.

MCC746\_002 D2O 1H

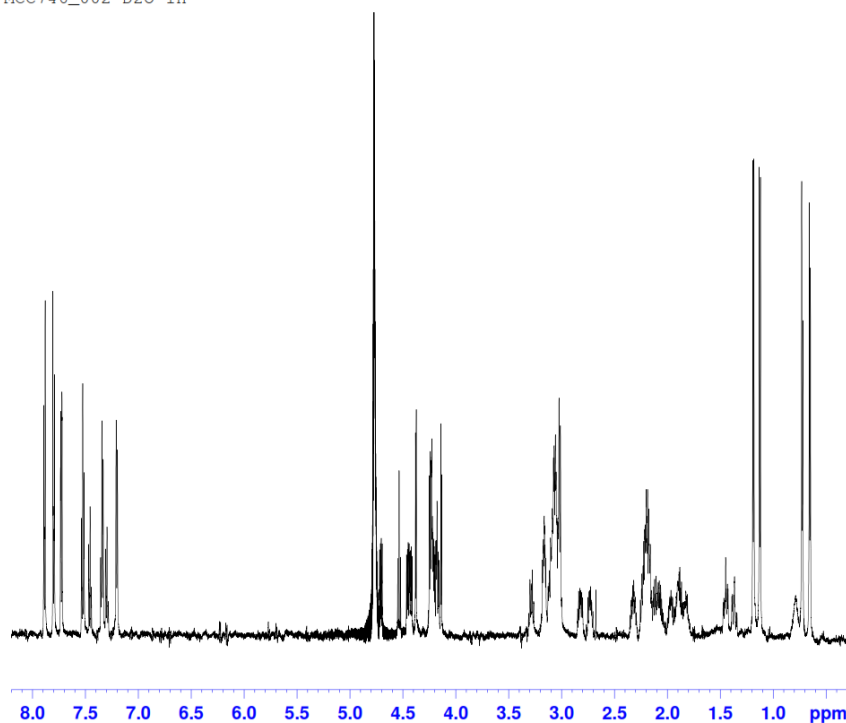

MCC746\_002 D2O 1H

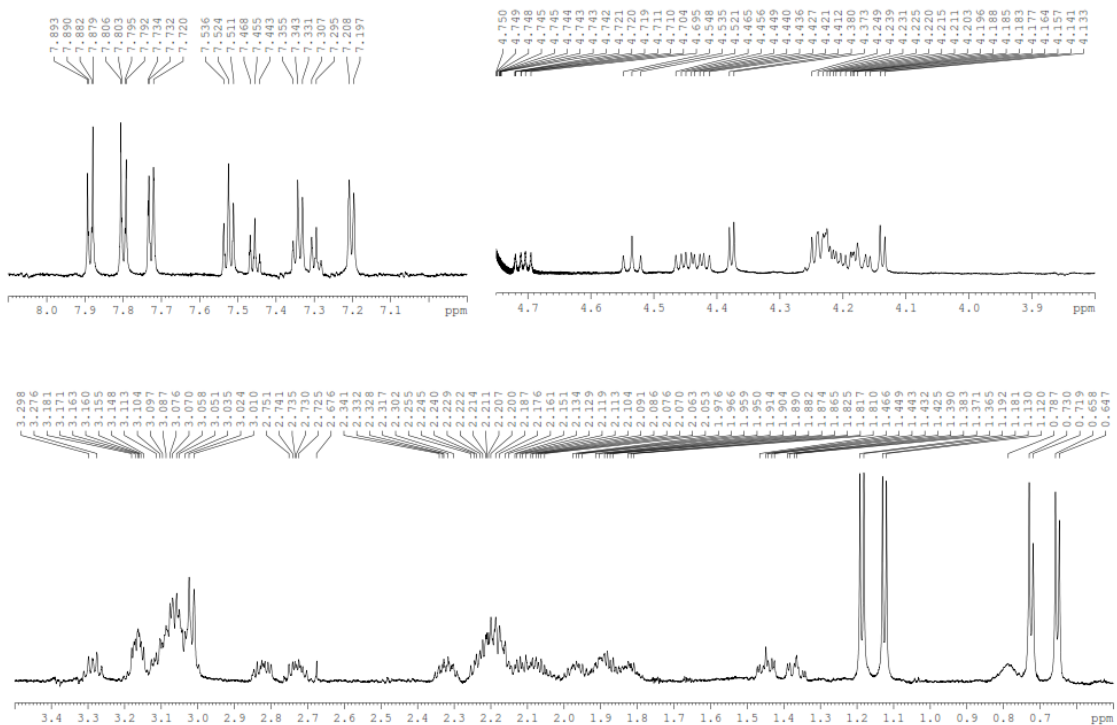

Figure S2d.  $^1\text{H}$  NMR in  $\text{D}_2\text{O}$  of compound 10.



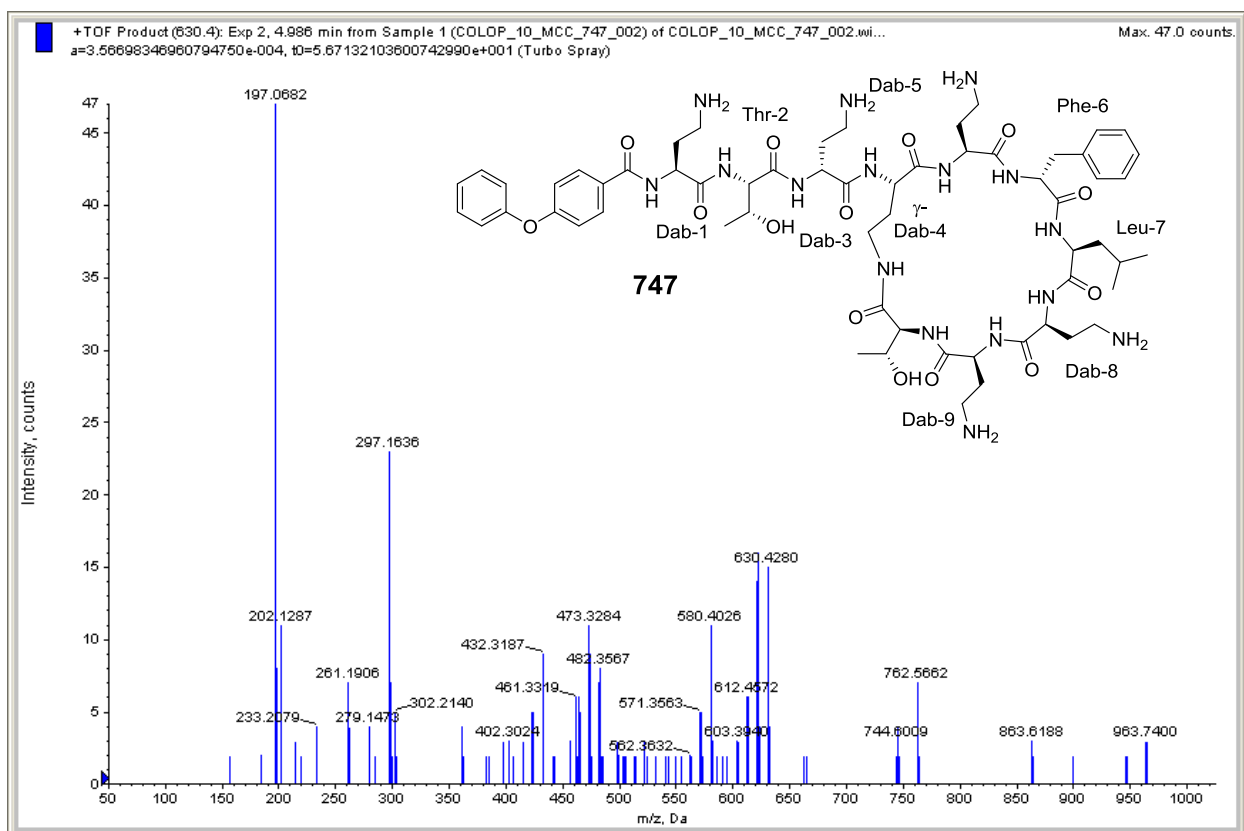

MCC747

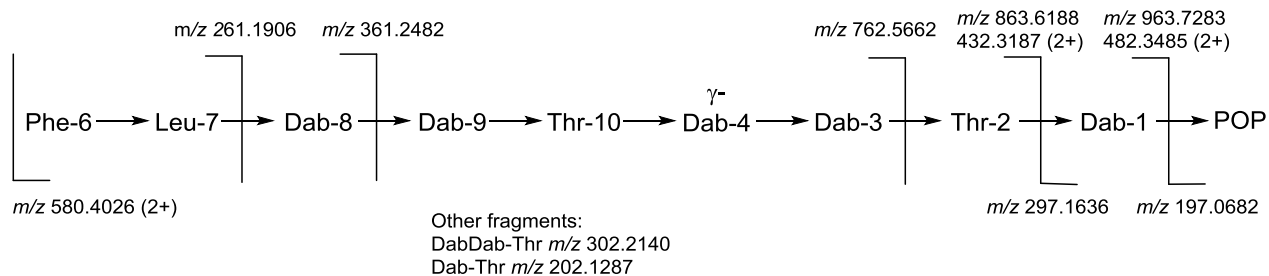

**Figure S3a. (+)-ESI-TOF-MS/MS fragmentation assignments of compound 14** from fragmentation of the  $[M+2H]^{2+}$  mass ion peak at  $m/z$  630.4, which were consistent with those previously reported for other polymyxins.<sup>1-3</sup>



## Mass Spectrum Molecular Formula Report

**Analysis Info**  
Analysis Name: D:\Data\cooper\MCC\_000747\_002\_RA5\_01\_8662.d  
Method: tune-wide\_50ul\_hystar\_withcal\_direct\_medhighmass\_2.m  
Sample Name: MCC\_000747\_002  
Comment: Comments  
Acquisition Date: 9/19/2014 4:48:33 PM  
Operator: a.piggott  
Instrument / Ser#: micrOTOF 232

**Acquisition Parameter**  
Source Type: ESI  
Focus: Not active  
Scan Begin: 100 m/z  
Scan End: 1500 m/z  
Ion Polarity: Positive  
Set Capillary: 4500 V  
Set End Plate Offset: -500 V  
Set Nebulizer: 0.8 Bar  
Set Dry Heater: 180 °C  
Set Dry Gas: 5.0 l/min  
Set Divert Valve: Source

### Generate Molecular Formula Parameter

Formula, min.: C60H92N16O14  
Formula, max.: C60H92N16O14  
Measured m/z: 630.349  
Check Valence: no  
Nitrogen Rule: yes  
Filter H/C Ratio: yes  
Estimate Carbon: yes  
Tolerance: 10 mDa  
Minimum: 0  
Electron Configuration: both  
Minimum: 0  
Charge: 2  
Maximum: 0  
Maximum: 3

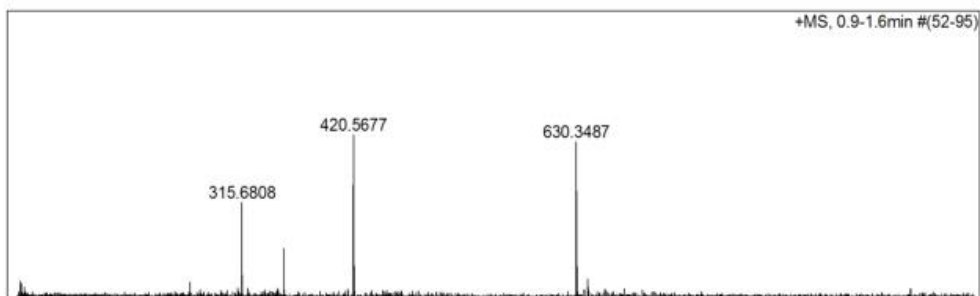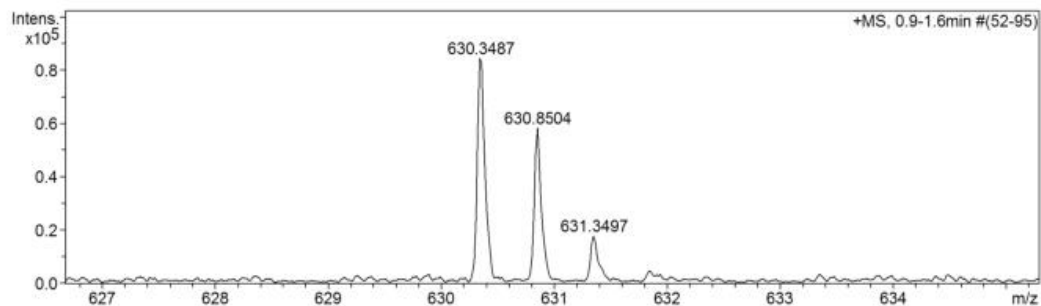

Figure S3b. HR-(+)-ESI-TOF-MS of the  $[M+2H]^{2+}$  mass ion peak of compound 14.

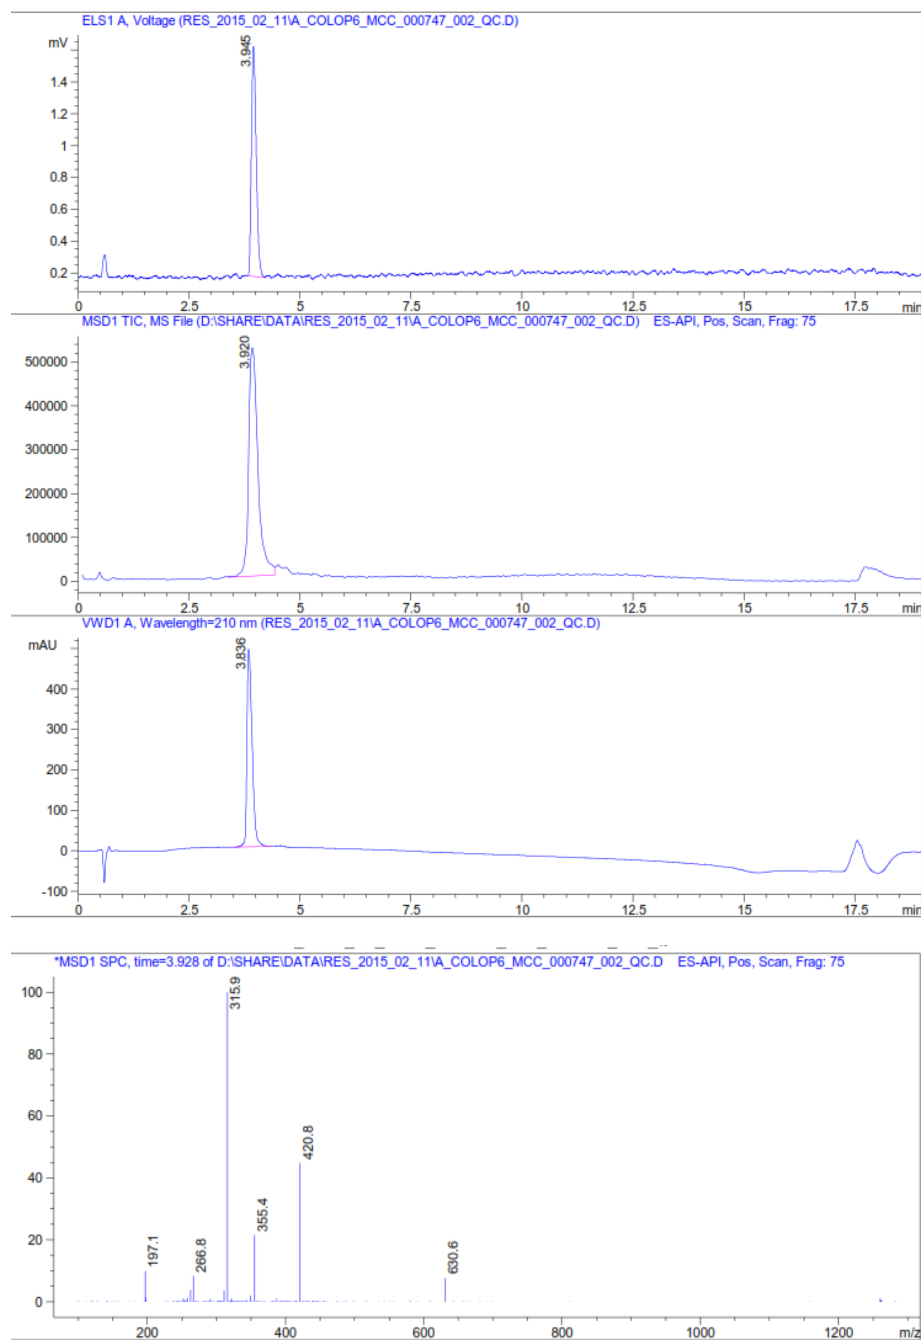

**Figure S3c.** LC-MS analysis of compound 14 showing ELSD, TIC, UV-vis absorption at 210 nm and ESI-MS.

MCC747\_002 D2O 1H

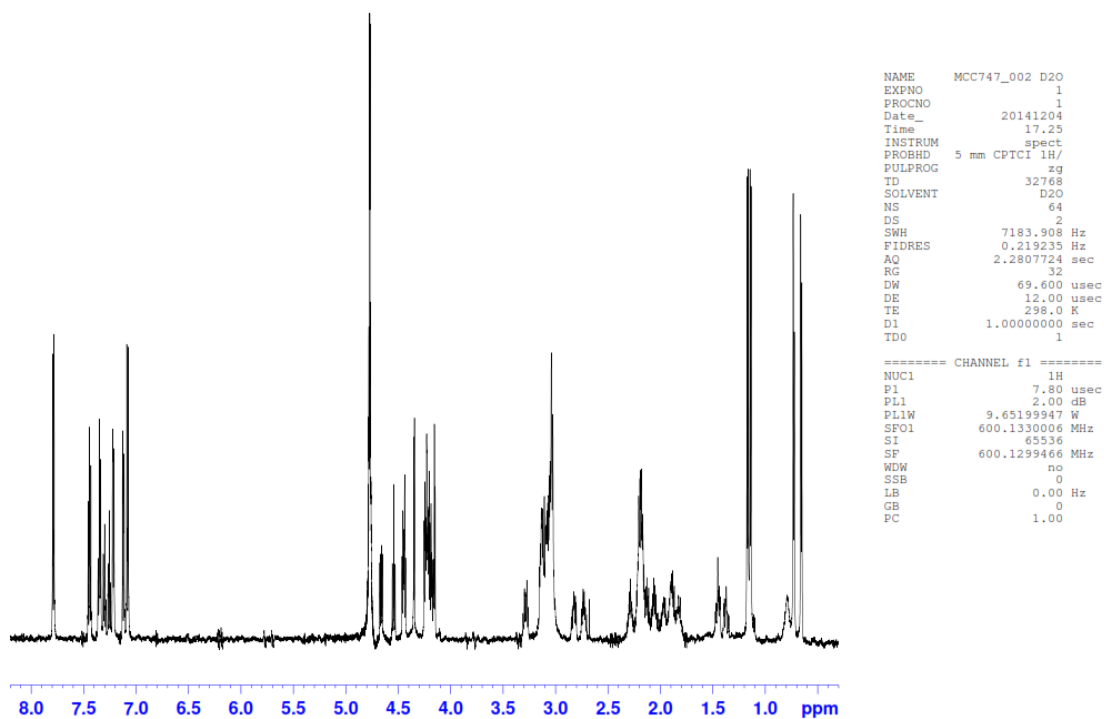

MCC747\_002 D2O 1H

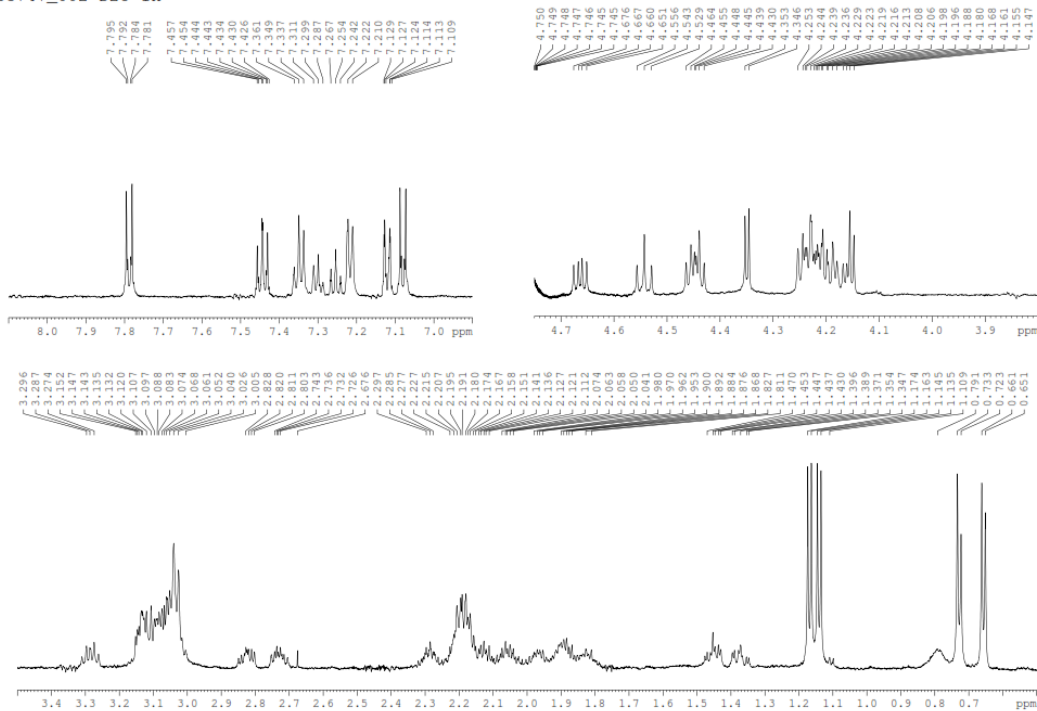

Figure S3d. <sup>1</sup>H NMR in D<sub>2</sub>O of compound 14.



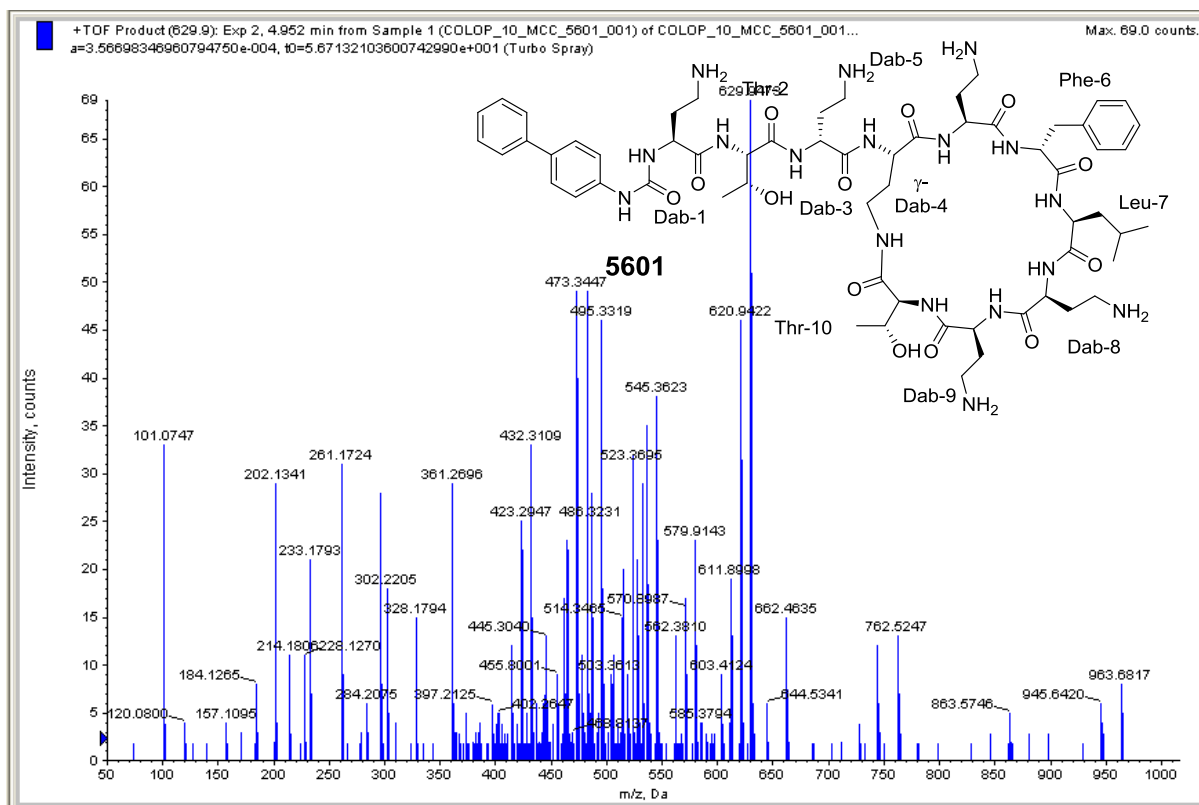

MCC5601

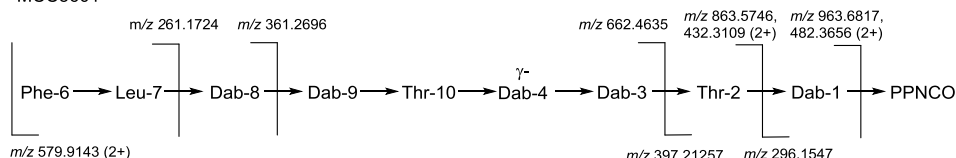

Other fragments:  
 Dab-Dab-Thr m/z 302.2205  
 Dab-Leu m/z 214.1806  
 Dab-Thr m/z 202.1341  
 Dab m/z 101.0747

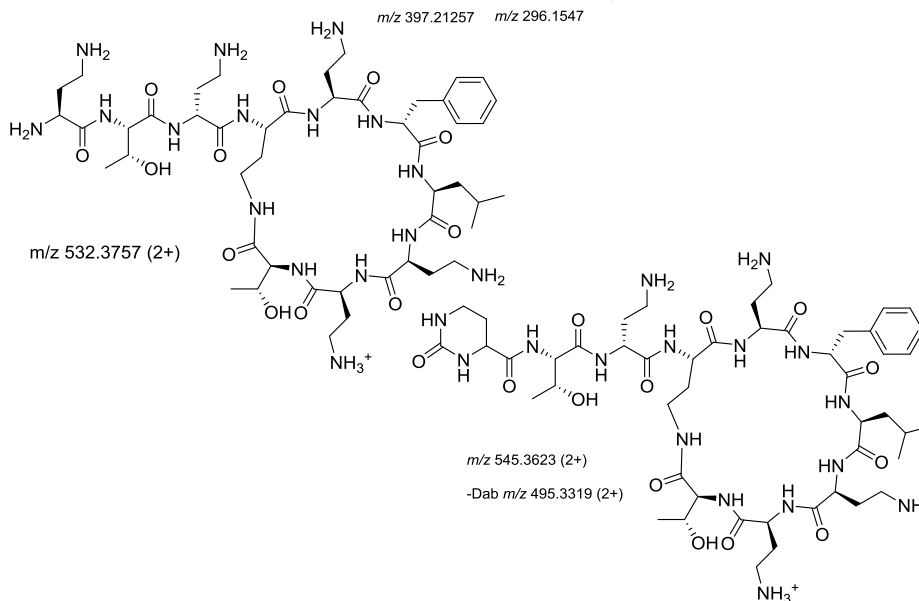

**Figure S4a. (+)-ESI-TOF-MS/MS fragmentation assignments of compound 15** from fragmentation of the  $[M+2H]^{2+}$  mass ion peak at  $m/z$  629.9, which were consistent with those previously reported for other polymyxins.<sup>1-3</sup>

## Mass Spectrum Molecular Formula Report

**Analysis Info**  
Analysis Name: D:\Data\cooper\MCC\_005601\_001\_RD6\_01\_8629.d  
Method: tune-wide\_50ul\_hystar\_withcal\_direct\_medhighmass\_2.m  
Sample Name: MCC\_005601\_001  
Comment: Comments  
Acquisition Date: 9/18/2014 10:13:42 PM  
Operator: a.piggott  
Instrument / Ser#: micrOTOF 232

**Acquisition Parameter**  
Source Type: ESI  
Focus: Not active  
Scan Begin: 100 m/z  
Scan End: 1500 m/z  
Ion Polarity: Positive  
Set Capillary: 4500 V  
Set End Plate Offset: -500 V  
Set Nebulizer: 0.8 Bar  
Set Dry Heater: 180 °C  
Set Dry Gas: 5.0 l/min  
Set Divert Valve: Source

**Generate Molecular Formula Parameter**  
Formula, min.: C60H93N17O13  
Formula, max.: C60H93N17O13  
Measured m/z: 629.859  
Check Valence: no  
Nitrogen Rule: yes  
Filter H/C Ratio: yes  
Estimate Carbon: yes  
Tolerance: 10 mDa  
Minimum: 0  
Electron Configuration: both  
Minimum: 0  
Charge: 2  
Maximum: 0  
Maximum: 3

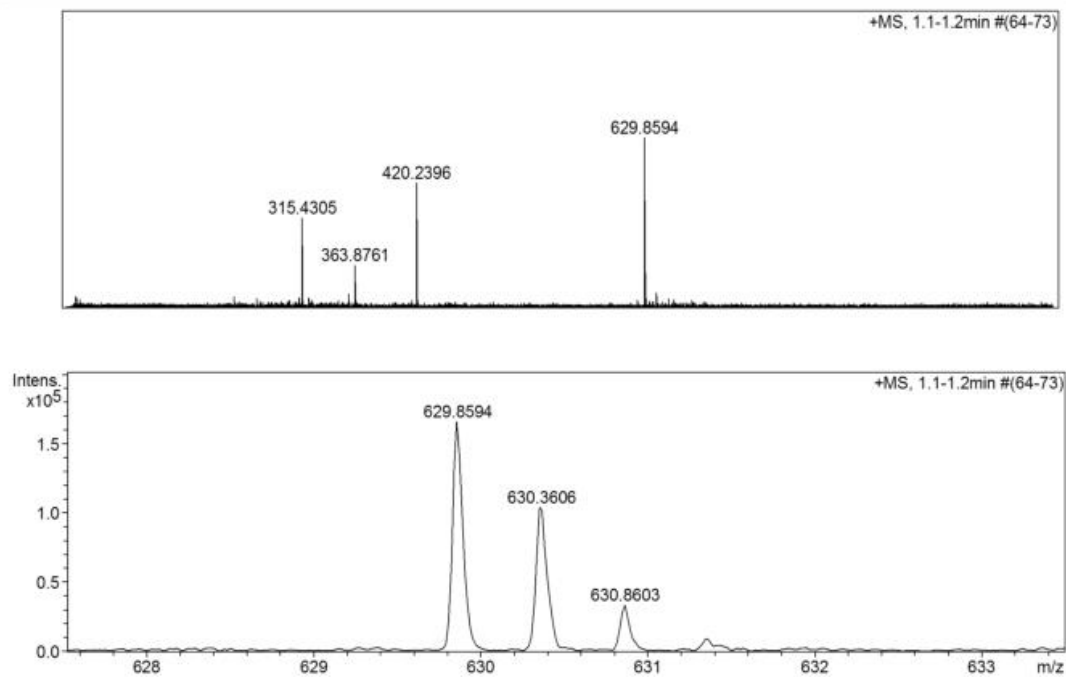

Figure S4b. HR-(+)-ESI-TOF-MS of the  $[M+2H]^{2+}$  mass ion peak of compound 15.

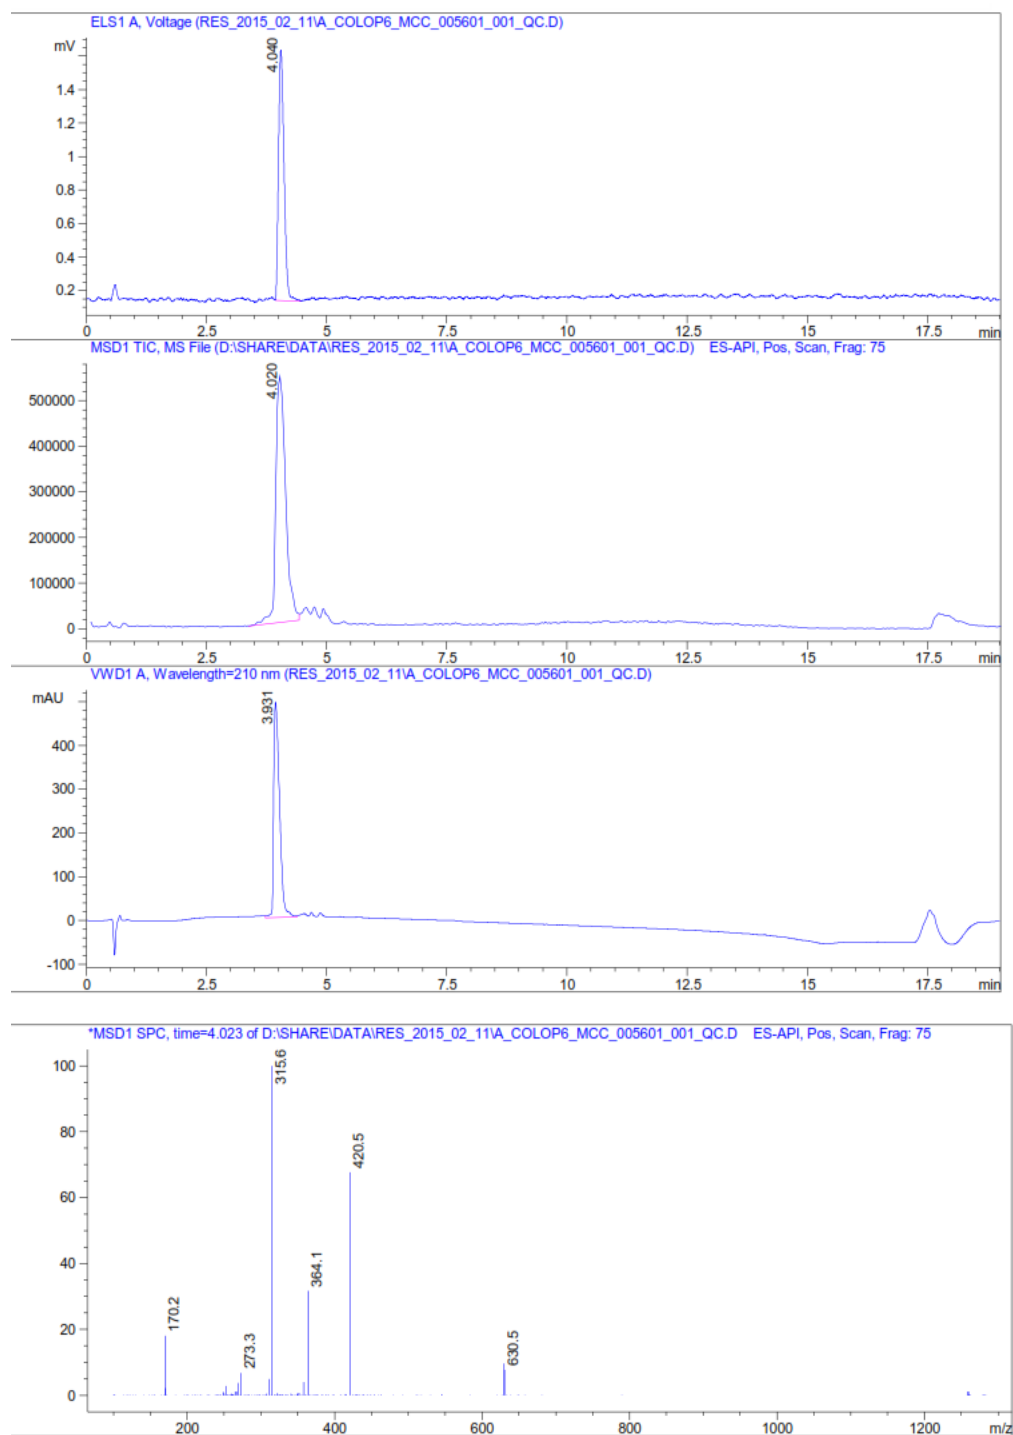

**Figure S4c.** LC-MS analysis of compound 15 showing ELSD, TIC, UV-vis absorption at 210 nm and ESI-MS.

MCC5601\_002 D2O 1H

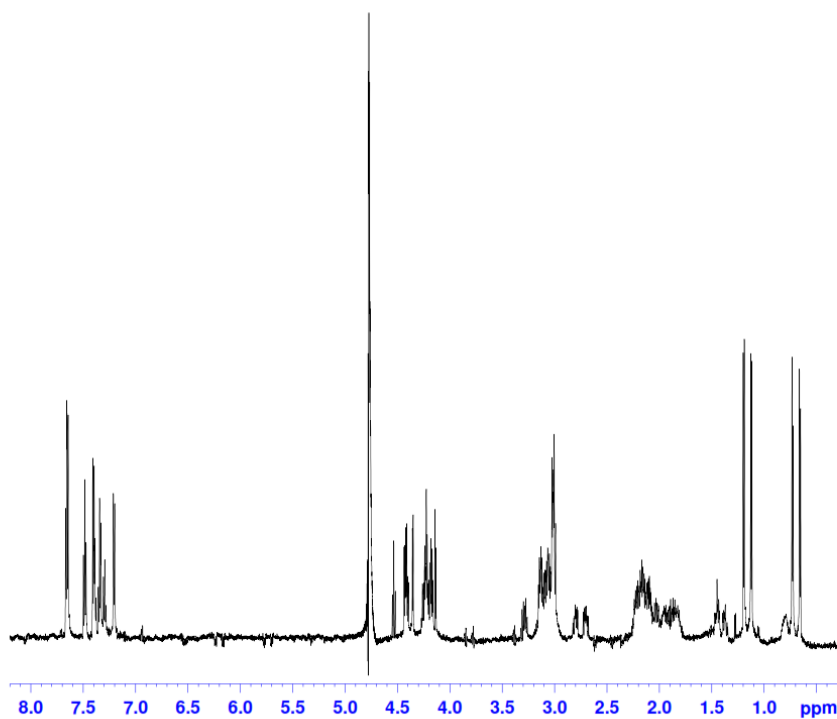

```
NAME      MCC5601_002 D2O
EXPNO     1
PROCNO    1
Date_     20141204
Time      17.11
INSTRUM   spect
PROBHD    5 mm CPTCI 1H/
PULPROG   zg
TD         32768
SOLVENT   D2O
NS         64
DS         2
SWH        7183.908 Hz
FIDRES    0.219235 Hz
AQ         2.2807724 sec
RG         57
DW         69.600 usec
DE         12.00 usec
TE         298.0 K
D1         1.00000000 sec
D10        1
===== CHANNEL f1 =====
NUC1      1H
P1         7.80 usec
PL1        2.00 dB
PL1W       9.65199947 W
SF01       600.1330006 MHz
SI         65536
SF         600.1299467 MHz
WDW        hz
SSB         0
LB         0.00 Hz
GB         0
PC         1.00
```

MCC5601\_002 D2O 1H

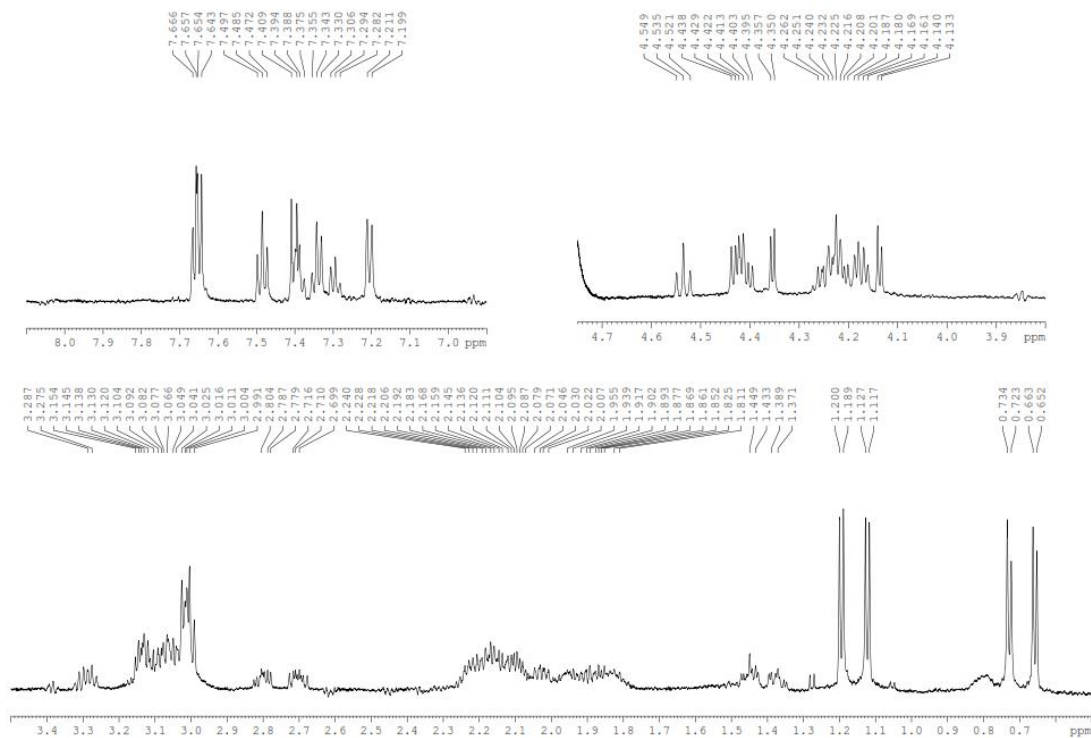

Figure S4d. <sup>1</sup>H NMR in D<sub>2</sub>O of compound 15.



MCC5601\_002 D2O gCOSY

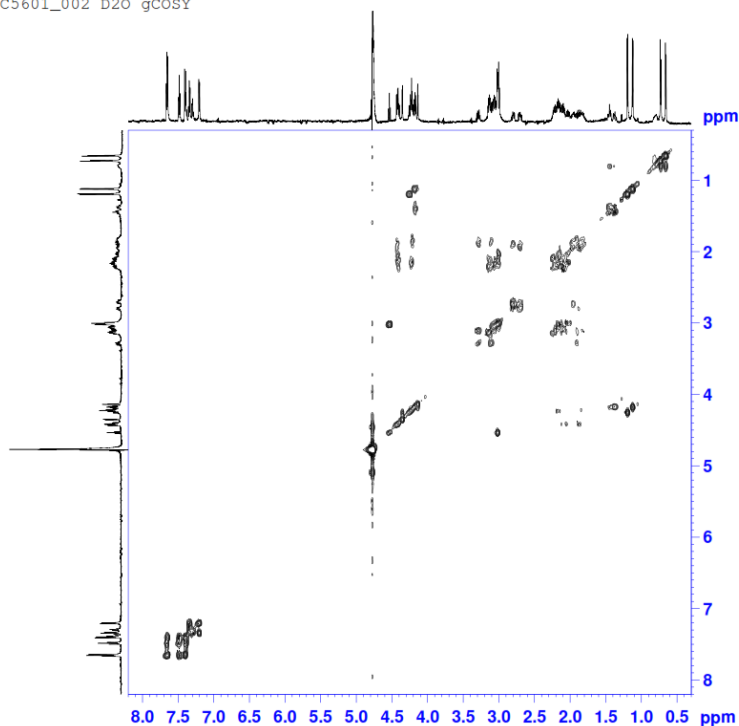

```
NAME MCC5601_002 D2O
EXPNO 2
PROCNO 1
Date_ 20141204
Time 21.15
INSTRUM spect
PROBHD 5 mm CPTCI 1H/
PULPROG cosygpgf
TD 2048
SOLVENT D2O
NS 8
DS 8
SWH 7183.908 Hz
FIDRES 3.507768 Hz
AQ 0.1426504 sec
RG 512
DW 69.600 usec
DE 12.00 usec
TE 298.0 K
D0 0.00000300 sec
D1 1.00000000 sec
D13 0.00000400 sec
D16 0.00020000 sec
IN0 0.00013920 sec

===== CHANNEL f1 =====
NUC1 1H
FO 7.80 usec
P1 7.80 usec
PL1 2.00 dB
PL1W 9.45199947 W
SFO1 600.1330004 MHz

===== GRADIENT CHANNEL =====
GPNAM1 sine,100
GP21 10.00 %
P16 1000.00 usec
NDD 1
TD 256
SFO1 600.133 MHz
FIDRES 28.062141 Hz
SW 11.971 ppm
FnMODE QF
SI 1024
SF 600.1299398 MHz
WDW OSINE
SSB 0
LB 0.00 Hz
GB 0
PC 1.00
SI 1024
SF 600.1299420 MHz
WDW OSINE
SSB 0
LB 0.00 Hz
GB 0
```

Figure S4e. gCOSY spectra in D<sub>2</sub>O of compound 15.

MCC5601\_002 D2O edHSQC

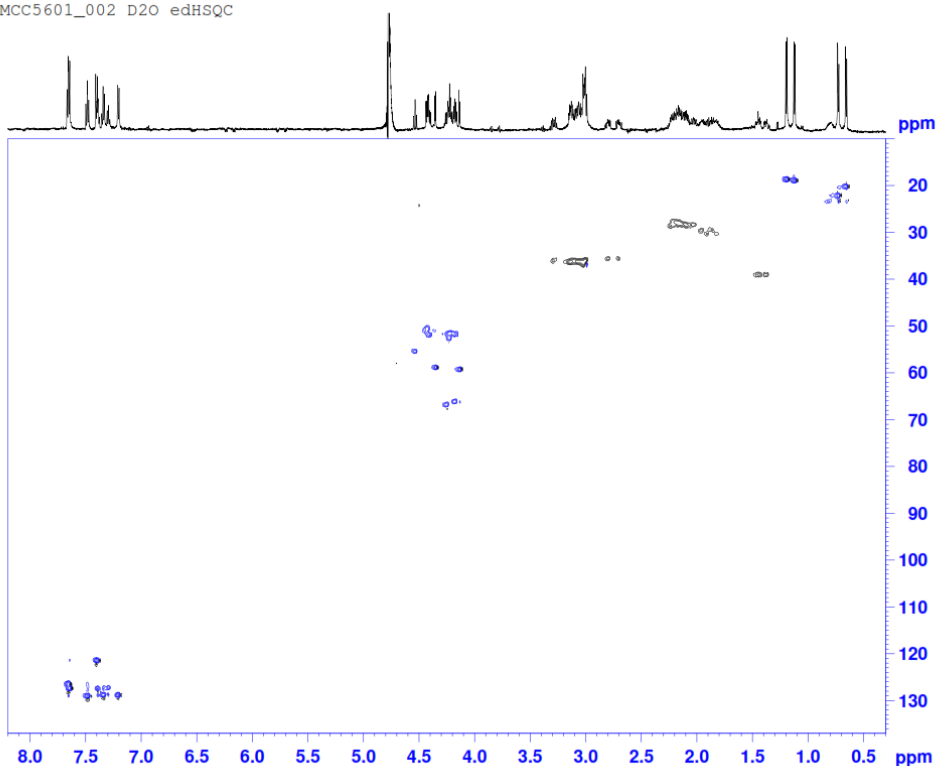

```
NAME MCC5601_002 D2O
EXPNO 2
PROCNO 1
Date_ 20141204
Time 21.15
INSTRUM spect
PROBHD 5 mm CPTCI 1H/
PULPROG hsqcpgpgf
TD 2048
SOLVENT D2O
NS 8
DS 8
SWH 7183.908 Hz
FIDRES 3.507768 Hz
AQ 0.1426504 sec
RG 512
DW 69.600 usec
DE 12.00 usec
TE 298.0 K
D0 0.00000300 sec
D1 1.00000000 sec
D13 0.00000400 sec
D16 0.00020000 sec
IN0 0.00013920 sec

===== CHANNEL f1 =====
NUC1 1H
FO 7.80 usec
P1 7.80 usec
PL1 2.00 dB
PL1W 9.45199947 W
SFO1 600.1330004 MHz

===== CHANNEL f2 =====
GPNAM2 ds,200wac,400.0
GP21 12.00
P14 300.00 usec
P16 1000.00 usec
P19 100.00 usec
P22 100.00 dB
P23 10.00 dB
P24 10.00 dB
P25 10.00 dB
P26 10.00 dB
P27 10.00 dB
P28 10.00 dB
P29 10.00 dB
P30 10.00 dB
P31 10.00 dB
P32 10.00 dB
P33 10.00 dB
P34 10.00 dB
P35 10.00 dB
P36 10.00 dB
P37 10.00 dB
P38 10.00 dB
P39 10.00 dB
P40 10.00 dB
P41 10.00 dB
P42 10.00 dB
P43 10.00 dB
P44 10.00 dB
P45 10.00 dB
P46 10.00 dB
P47 10.00 dB
P48 10.00 dB
P49 10.00 dB
P50 10.00 dB
P51 10.00 dB
P52 10.00 dB
P53 10.00 dB
P54 10.00 dB
P55 10.00 dB
P56 10.00 dB
P57 10.00 dB
P58 10.00 dB
P59 10.00 dB
P60 10.00 dB
P61 10.00 dB
P62 10.00 dB
P63 10.00 dB
P64 10.00 dB
P65 10.00 dB
P66 10.00 dB
P67 10.00 dB
P68 10.00 dB
P69 10.00 dB
P70 10.00 dB
P71 10.00 dB
P72 10.00 dB
P73 10.00 dB
P74 10.00 dB
P75 10.00 dB
P76 10.00 dB
P77 10.00 dB
P78 10.00 dB
P79 10.00 dB
P80 10.00 dB
P81 10.00 dB
P82 10.00 dB
P83 10.00 dB
P84 10.00 dB
P85 10.00 dB
P86 10.00 dB
P87 10.00 dB
P88 10.00 dB
P89 10.00 dB
P90 10.00 dB
P91 10.00 dB
P92 10.00 dB
P93 10.00 dB
P94 10.00 dB
P95 10.00 dB
P96 10.00 dB
P97 10.00 dB
P98 10.00 dB
P99 10.00 dB
P100 10.00 dB

===== GRADIENT CHANNEL =====
GPNAM1 sine,100
GP21 10.00 %
P16 1000.00 usec
NDD 1
TD 256
SFO1 600.133 MHz
FIDRES 28.062141 Hz
SW 11.971 ppm
FnMODE QF
SI 1024
SF 600.1299398 MHz
WDW OSINE
SSB 0
LB 0.00 Hz
GB 0
PC 1.00
SI 1024
SF 600.1299420 MHz
WDW OSINE
SSB 0
LB 0.00 Hz
GB 0
```

Figure S4f. edHSQC spectra in D<sub>2</sub>O of compound 15.

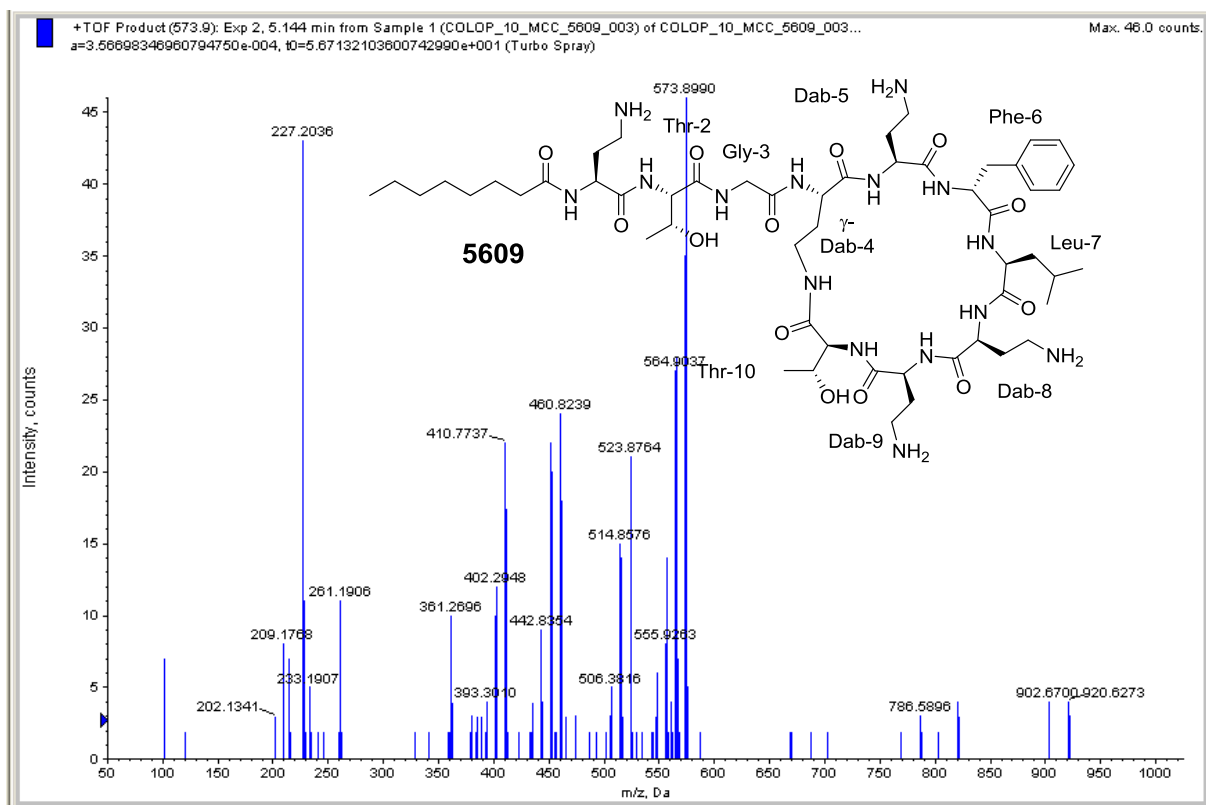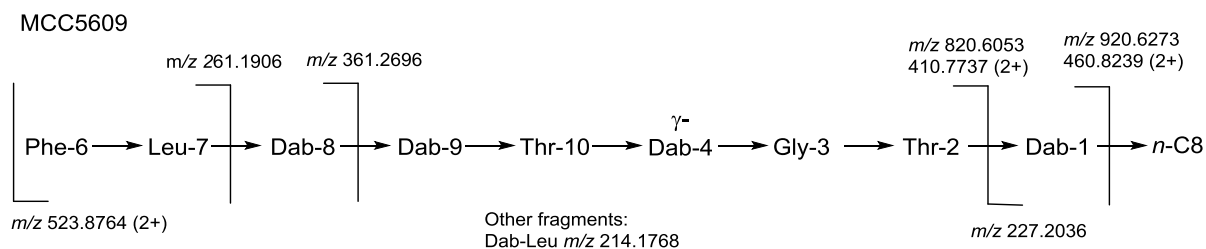

**Figure S5a.** (+)-ESI-TOF-MS/MS fragmentation assignments of compound **38** from fragmentation of the  $[M+2H]^{2+}$  mass ion peak at  $m/z$  573.8, which were consistent with those previously reported for other polymyxins.<sup>1-3</sup>

## Mass Spectrum Molecular Formula Report

### Analysis Info

Analysis Name D:\Data\cooper\MCC\_005609\_003\_RD7\_01\_8630.d  
Method tune-wide\_50ul\_hystar\_withcal\_direct\_medhighmass\_2.m  
Sample Name MCC\_005609\_003  
Comment Comments

Acquisition Date 9/18/2014 10:19:12 PM

Operator a.piggott  
Instrument / Ser# micrOTOF 232

### Acquisition Parameter

|             |            |                      |          |                  |           |
|-------------|------------|----------------------|----------|------------------|-----------|
| Source Type | ESI        | Ion Polarity         | Positive | Set Nebulizer    | 0.8 Bar   |
| Focus       | Not active |                      |          | Set Dry Heater   | 180 °C    |
| Scan Begin  | 100 m/z    | Set Capillary        | 4500 V   | Set Dry Gas      | 5.0 l/min |
| Scan End    | 1500 m/z   | Set End Plate Offset | -500 V   | Set Divert Valve | Source    |

### Generate Molecular Formula Parameter

|                  |              |                        |        |         |   |
|------------------|--------------|------------------------|--------|---------|---|
| Formula, min.    | C53H93N15O13 |                        |        |         |   |
| Formula, max.    | C53H93N15O13 |                        |        |         |   |
| Measured m/z     | 573.855      | Tolerance              | 10 mDa | Charge  | 2 |
| Check Valence    | no           | Minimum                | 0      | Maximum | 0 |
| Nitrogen Rule    | yes          | Electron Configuration | both   |         |   |
| Filter H/C Ratio | yes          | Minimum                | 0      | Maximum | 3 |
| Estimate Carbon  | yes          |                        |        |         |   |

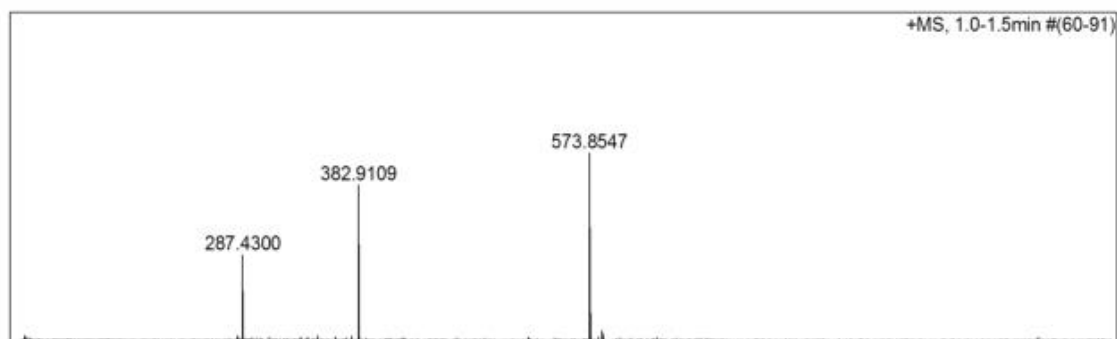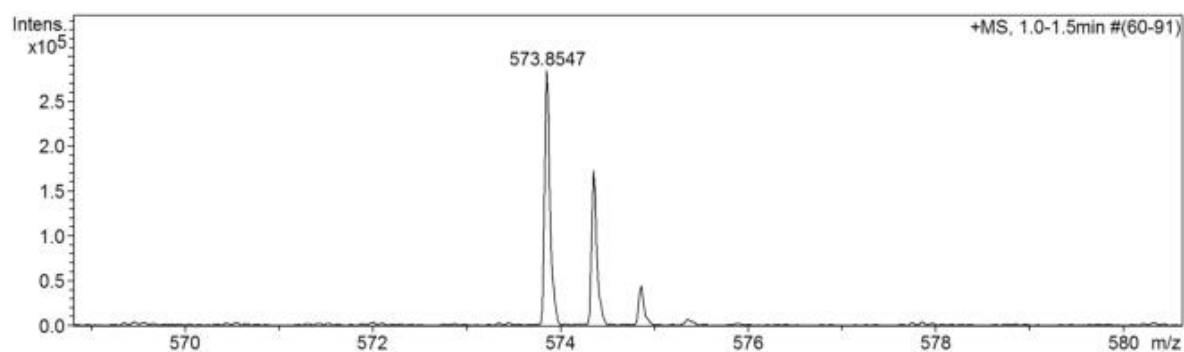

Figure S5b. HR-(+)-ESI-TOF-MS of the  $[M+2H]^{2+}$  mass ion peak of compound 38.

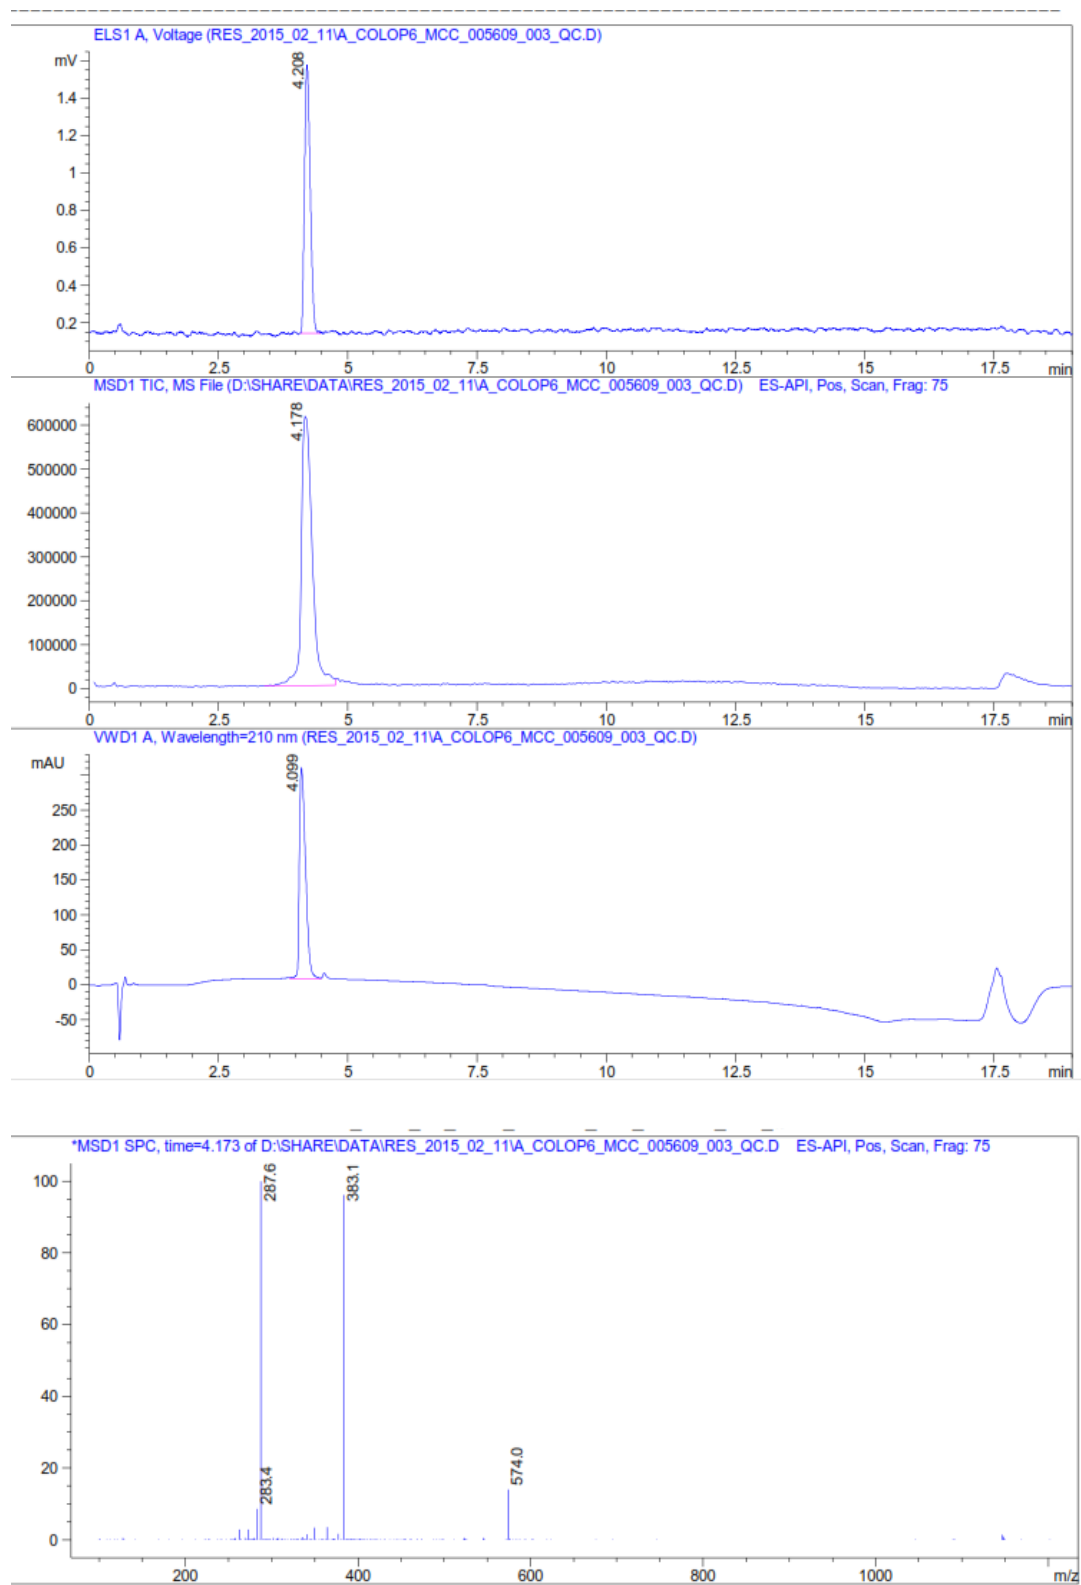

**Figure S5c. LC-MS analysis of compound 38** showing ELSD, TIC, UV-vis absorption at 210 nm and ESI-MS.

MCC5609\_003 D2O 1H

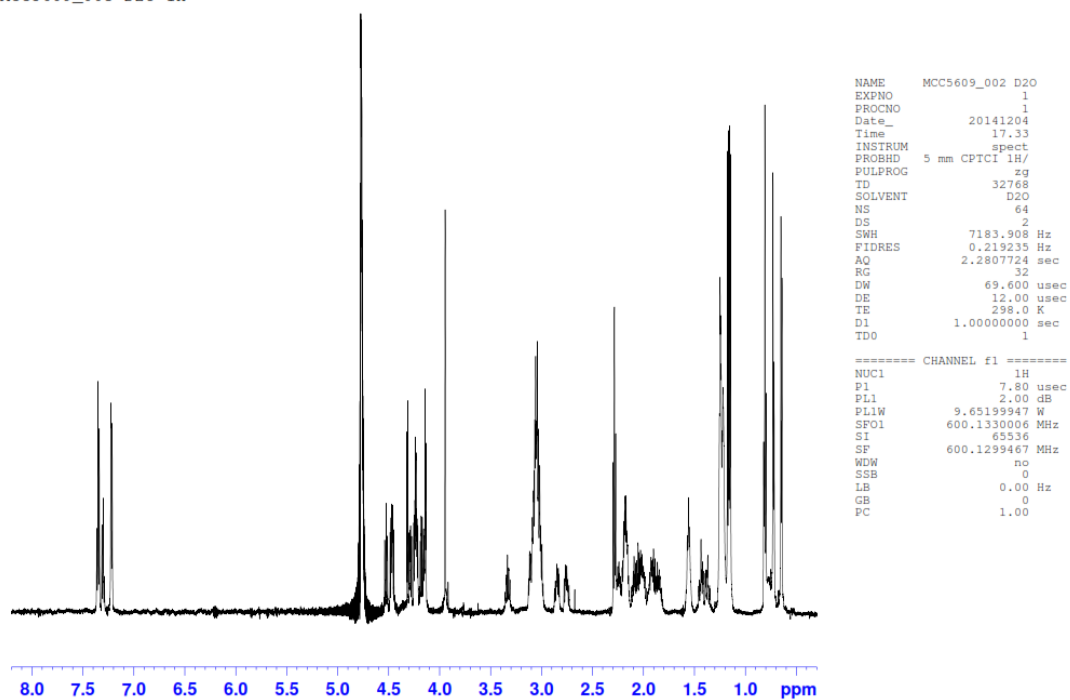

MCC5609\_003 D2O 1H

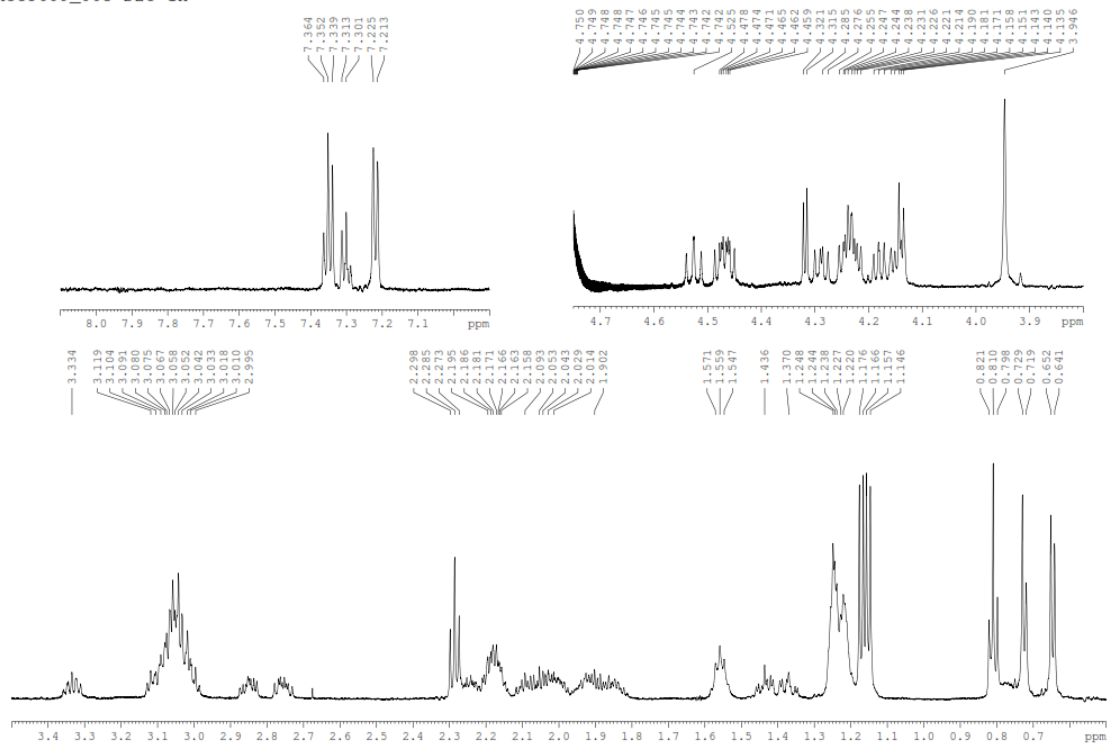

Figure S5d.  $^1\text{H}$  NMR in  $\text{D}_2\text{O}$  of compound 38.

MCC5609\_003 D2O gCOSY

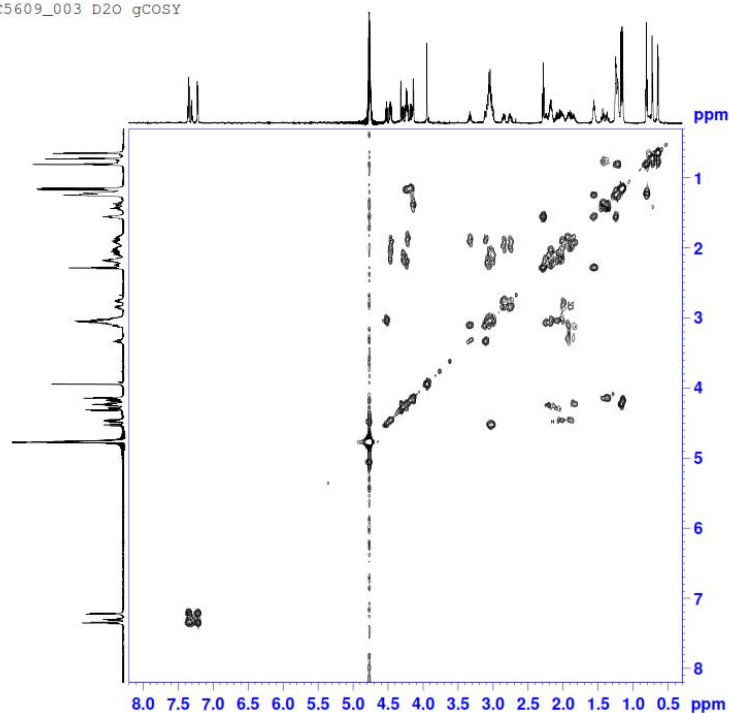

```

NAME MCC5609_002 D2O
EXPNO 2
PROCNO 1
Date_ 20141204
Time 17.35
INSTRUM spect
PROBHD 5 mm CPTCI 1H/
PULPROG cosygpgzf
TD 2048
SOLVENT D2O
NS 8
DS 8
SWH 7183.908 Hz
FIDRES 3.507768 Hz
AQ 0.1426604 sec
RG 645.1
DW 69.600 usec
DE 12.00 usec
TE 298.0 K
D0 0.00000300 sec
D1 1.00000000 sec
D13 0.00000400 sec
D16 0.00020000 sec
IN0 0.00013920 sec

===== CHANNEL f1 =====
NUC1 1H
P0 7.80 usec
P1 7.80 usec
PL1 2.00 dB
PL1W 9.6519947 W
SFO1 600.133006 MHz

===== GRADIENT CHANNEL =====
GPNAM1 sine.100
GP21 10.00 %
P16 1000.00 usec
ND0 1
TD 256
SFO1 600.133 MHz
FIDRES 28.062141 Hz
SW 11.971 ppm
FnMODE QF
SI 1024
SF 600.1299334 MHz
WDW QSINE
SSB 0
LB 0.00 Hz
GB 0
PC 1.00
SI 1024
MC2 QF
SF 600.1299460 MHz
WDW QSINE
SSB 0
LB 0.00 Hz
GB 0
  
```

Figure S5e. gCOSY in D<sub>2</sub>O of compound 38.

MCC5609\_003 D2O gHSQC

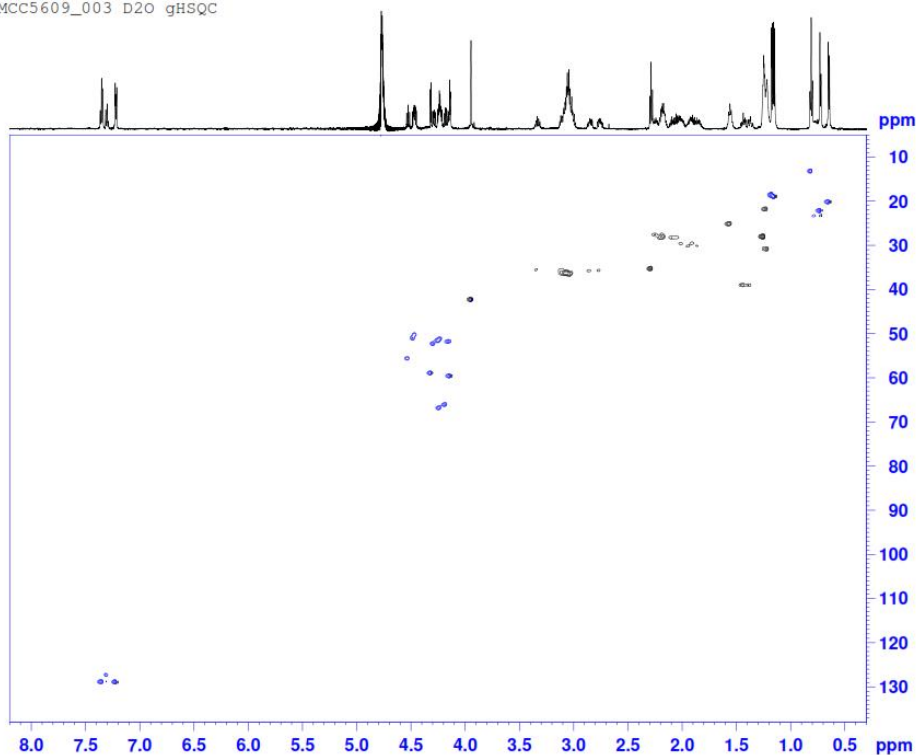

```

NAME MCC5609_003 D2O
EXPNO 2
PROCNO 1
Date_ 20141204
Time 18.14
INSTRUM spect
PROBHD 5 mm CPTCI 1H/
PULPROG hsqcpgzf
TD 2048
SOLVENT D2O
NS 8
DS 8
SWH 7183.908 Hz
FIDRES 3.507768 Hz
AQ 0.1426604 sec
RG 645.1
DW 69.600 usec
DE 12.00 usec
TE 298.0 K
D0 0.00000300 sec
D1 1.00000000 sec
D13 0.00000400 sec
D16 0.00020000 sec
IN0 0.00013920 sec

===== CHANNEL f1 =====
NUC1 1H
P0 7.80 usec
P1 7.80 usec
PL1 2.00 dB
PL1W 9.6519947 W
SFO1 600.133006 MHz

===== CHANNEL f2 =====
GPNAM2 hsqcpgzf
GPNAM1 sine.100
GP21 10.00 %
P16 1000.00 usec
ND0 1
TD 256
SFO1 600.133 MHz
FIDRES 28.062141 Hz
SW 11.971 ppm
FnMODE QF
SI 1024
SF 600.1299334 MHz
WDW QSINE
SSB 0
LB 0.00 Hz
GB 0
PC 1.00
SI 1024
MC2 QF
SF 600.1299460 MHz
WDW QSINE
SSB 0
LB 0.00 Hz
GB 0
  
```

Figure S5f. edHSQC in D<sub>2</sub>O of compound 38.

|                        |                                                                                                                                                  |                        |                          |
|------------------------|--------------------------------------------------------------------------------------------------------------------------------------------------|------------------------|--------------------------|
| Formula                | C <sub>28</sub> H <sub>38</sub> NO <sub>4</sub>                                                                                                  | FW                     | 381.4217                 |
| Acquisition Time (sec) | 3.4079                                                                                                                                           | Comment                | AGG_210513_FmocThrOAllyl |
| Date Stamp             | May 21 2013                                                                                                                                      | Date                   | May 21 2013              |
| File Name              | \\dataonline.imb.uq.edu.au\gallardo\godo\Colistin Project\NMR\AGG_210513_FmocThrOAllyl\AGG_210513_FmocThrOAllyl_PROTON_cdcl3_20130521_02.fid.tif |                        |                          |
| Frequency (MHz)        | 399.78                                                                                                                                           | Nucleus                | <sup>1</sup> H           |
| Points Count           | 16384                                                                                                                                            | Number of Transients   | 32                       |
| Spectrum Offset (Hz)   | 2009.4801                                                                                                                                        | Receiver Gain          | 60.00                    |
|                        |                                                                                                                                                  | Solvent                | CHLOROFORM-d             |
|                        |                                                                                                                                                  | Sweep Width (Hz)       | 4807.69                  |
|                        |                                                                                                                                                  | Temperature (degree C) | 25.000                   |

<sup>1</sup>H NMR (400 MHz, CHLOROFORM-d) δ ppm 1.28 (d, *J*=5.87 Hz, 3 H) 4.26 (t, *J*=6.90 Hz, 1 H) 4.33 - 4.42 (m, 2 H) 4.44 (d, *J*=7.04 Hz, 2 H) 4.70 (d, *J*=5.58 Hz, 2 H) 5.22 - 5.31 (m, 1 H) 5.36 (d, *J*=17.02 Hz, 1 H) 5.59 (d, *J*=8.80 Hz, 1 H) 5.93 (ddt, *J*=16.87, 11.08, 5.54, 5.54 Hz, 1 H) 7.29 - 7.38 (m, 2 H) 7.38 - 7.48 (m, 2 H) 7.57 - 7.68 (m, 2 H) 7.78 (d, *J*=7.34 Hz, 2 H)

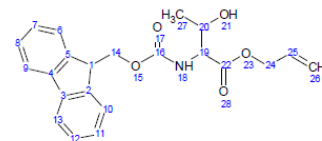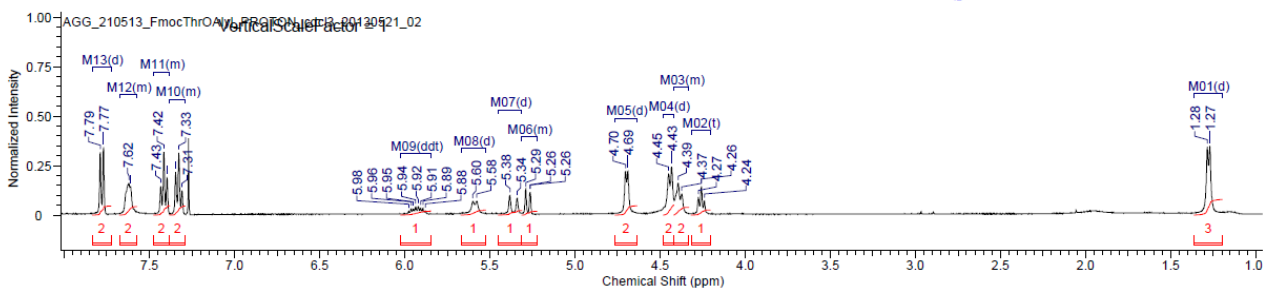

Figure S6. <sup>1</sup>H NMR in CDCl<sub>3</sub> of intermediate Fmoc-L-Thr-Oallyl (4; Scheme 1)

## REFERENCES

1. Govaerts, C.; Rozenski, J.; Orwa, J.; Roets, E.; Van Schepdael, A.; Hoogmartens, J. Mass spectrometric fragmentation of cyclic peptides belonging to the polymyxin and colistin antibiotics studied by ion trap and quadrupole/orthogonal-acceleration time-of-flight technology. *Rapid Commun. Mass Spectrom.* **2002**, *16*, 823–833.
2. Deng, Y.; Lu, Z.; Bi, H.; Lu, F.; Zhang, C.; Bie, X. Isolation and characterization of peptide antibiotics LI-F04 and polymyxin B6 produced by *Paenibacillus polymyxa* strain JSa-9. *Peptides* **2011**, *32*, 1917–1923.
3. Qian, C. D.; Wu, X. C.; Teng, Y.; Zhao, W. P.; Li, O.; Fang, S. G.; Huang, Z. H.; Gao, H. C. Battacin (Octapeptin B5), a new cyclic lipopeptide antibiotic from *Paenibacillus tianmuensis* active against multidrug-resistant Gram-negative bacteria. *Antimicrob. Agents Chemother.* **2012**, *56*, 1458-1465.
